# Supplementary material
Source: PubMed Central journal article supplement (PMC7805327)
Supplement: advancesADV2020003458-suppl1.pdf [file advancesADV2020003458-suppl1.pdf]

## **SUPPLEMENTARY MATERIALS AND METHODS**

### **Glucose, Glutamine and FA uptake**

Freshly sorted or cytokine-activated NK cells (500k cells) were starved for 30 minutes in glucose/glutamine/pyruvate-free DMEM (Thermo Fisher).  $^3\text{H-L-Glutamine}$  or  $^3\text{H-2-Deoxy-D-Glucose}$  (2-DG) (Promega) were added and cells were incubated for 10 minutes at  $37^\circ\text{C}$ , 5%  $\text{CO}_2$ . Cells were washed with cold PBS and SDS 0,1% and transferred to tubes with scintillant to be analyzed in a scintillation counter (Perkin Elmer). The fluorescent dye Bodipy FL-C<sub>16</sub> (Thermo Fisher) was added to cells in culture for 30 minutes at  $37^\circ\text{C}$ , 5%  $\text{CO}_2$ . Cells were washed and acquired analyzed by FACS.

### **Single-cell BioMark™**

NK cells were sorted as single cells directly in 96-well qPCR plates with the RT mix 1 (5xVILO Reaction Mix, 200U/ul SUPERase-In, 10% NP40, nuclease free water). RT was performed according to manufacturer's protocols (Fluidigm). The dynamic Array IFC chip was prepared according to manufacturer's protocols and analyzed in the Biomark System (Fluidigm). Cycle threshold (Ct) values were collected from the machine, and the relative expression was calculated accounting the primer efficiencies (Pfaffl formula). Results were run in Prism8 and Qlucore (<https://qlucore.com/>).

## SUPPLEMENTARY TABLE

### Table 1. Expression levels of genes involved in metabolic pathways; related to Figure 1.

Gene lists were downloaded from the KEGG pathway database and applied to the RNAseq data. Relative expression values for NKDim (red, n=4 donors) and NKBr (blue, n=2 donors). Pathways: Glycolysis, OXPHOS, Pyruvate metabolism and TCA cycle, Mitochondria dynamics, Nucleotide metabolism, Fatty acid metabolism, Proteasome metabolism.

## SUPPLEMENTARY FIGURES

### Figure S1. Activated NKBr, NKDim upregulate nutrients receptors.

(A-B) Representative plots of the gating strategy for fluorescent-activated cell sorting (FACS) analysis of freshly isolated NK cells from the blood of healthy adult donors. Total ILCs were gated on viable CD45<sup>+</sup> Lin<sup>-</sup> (CD3<sup>-</sup>CD4<sup>-</sup>CD5<sup>-</sup>TCRαβ<sup>-</sup>TCRγδ<sup>-</sup>CD14<sup>-</sup>CD19<sup>-</sup>) CD7<sup>+</sup> cells (orange). NKDim cells are identified as CD56<sup>low</sup>CD16<sup>+</sup>CD127<sup>-</sup> cells (red), NKBr as CD56<sup>high</sup>CD16<sup>-</sup>CD127<sup>+</sup> cells (blue). Percentage of total NKBr and NKDim cells from total CD45<sup>+</sup> healthy adult donors. Results from ten independent donors (median). (B) Expression level of Slc2a1 (GLUT-1) and Slc2a5 (ASCT2). Data extracted from RNAseq analysis. (C) Representative plots of Glut1 and ASCT2 on NKBr and NKDim. FACS analysis of CD71 (transferrin receptors), CD98 (large neutral amino acid transporter LAT1) and CD36 (fatty acid translocase FAT) on freshly sorted blood NK cells or cultured for 18h with IL-15 or IL-15-12-18. Data from three healthy donors. (D) <sup>3</sup>H-L-Glutamine and <sup>3</sup>H-2-Deoxy-D-Glucose (2-DG) uptake analysis on freshly sorted blood NK cells or cultured for 18h with IL-15 or IL-15-12-18. Data from two independent experiments with one healthy donor each (F-G) Functional analysis of primed and activated NKBr and NKDim cultured or not with indicated inhibitors. FACS analysis of (E) TNF-α, (F) live CD45<sup>+</sup> cells, (G) CD107a, Granzyme B and Perforin. Data from six healthy donors. Data are mean ±SEM; not significant (ns) or not indicated; \*p<0.05; \*\*p<0.01; \*\*\*p<0.001; \*\*\*\*p<0.0001 using two-way ANOVA with Tukey's correction or (A) Student's t-test.

**Figure S2. Metabolic profile of freshly sorted NKBr and NKDim.**

(A) ATP-linked respiration analyzed by extracellular flux analysis (EFA) in FACS sorted NKBr and NKDim cells isolated from the blood of three healthy donors. (B-D) RNA-Seq heatmaps depicting differentially expressed (log<sub>2</sub> FC) genes from pathways related to energy metabolism, comparing FACS sorted NKDim (red, n=4 donors) and NKBr (blue, n=2 donors) cells: (B) Carbohydrate metabolism, (C) OXPHOS and (D) Lipid Metabolism. (E) ATP-linked respiration analyzed by EFA in cultured or not for 18h with IL-15 or IL-15-12-18. Data are mean ±SEM; not significant (ns) or not indicated; \*p<0.05; \*\*p<0.01; using two-way ANOVA with Tukey's correction.

**Figure S3. TMRM<sup>+</sup> NKDim express genes of the OXPHOS pathway. Mitochondrial activity in circulating versus tissue resident NK cells at steady-state.**

(A) NKBr and NKDim were cultured with IL-15 or IL-15-12-18 +/- 10μM rotenone and 10μM antimycin A for 18h. TMRM intensity was measured by FACS. Summary plot of three independent experiments with one healthy donor each. (B-D) Metabolic pathway gene profiles of TMRM<sup>+</sup> and TMRM<sup>-</sup> NKDim cells freshly sorted from the blood of healthy donors. Analysis done by high throughput PCR (Fluidigm BioMark HD). (B) representative plot of TMRM<sup>+</sup> NKBr and NKDim, (C) Single cells data and (D) OXPHOS gene expression profiles in bulks of 500 cells each summarized from two healthy donors. (E) FACS analysis of NK cells from pediatric tonsils. Tonsil NK (Ton-NK) cells were gated on lymphoid size and granularity, singlet and viable CD45<sup>+</sup>Lin<sup>-</sup>CD7<sup>+</sup>CD127<sup>-</sup>CD56<sup>+</sup>CD16<sup>-</sup> population. (F) Percentage of Ton-NK from total CD45<sup>+</sup>. Results from 18 donors (G) Mitotracker green and TMRM measurements in freshly sorted blood NKDim, NKBr and Ton-NK cells (H) Mitotracker green and TMRM ratio. Data from five healthy donors. Data are mean ±SEM; not significant (ns) or not indicated; \*p<0.05; \*\*\*p<0.001; using two-way ANOVA with Tukey's correction or Student's t-test.

**Figure S4. Combinatorial effect of IL-12/18 on NKDim metabolic profile**

(A) TMRM and Mitotracker measurements of NKBr and NKDim cultured in the indicated conditions for 18h. Data were plotted together with results from NKBr and NKDim from Figure 4. (B-D) Cultured NKBr and NKDim were incubated for 18h with the indicated inhibitors. (B) CD45<sup>+</sup> live cells, (C) TNFα, (D) CD107a, Granzyme B and

Perforin were measured by FACS. Data from three independent experiments with at least two donors each. Data are mean  $\pm$ SEM; not significant (not indicated),  $p>0.05$ ; \* $p<0.05$ ; \*\* $p<0.01$ ; \*\*\*\* $p<0.0001$  using two-way ANOVA with Tukey's correction.

**Figure S5. Activated NKDim and NKBr have fragmented mitochondria.**

(A) TMRM intensity in fragmented versus total NKBr and NKDim cells. Dots represent technical replicates. (B-C) Freshly sorted (B) NKDim and (C) NKBr stained with Mitotracker green or TMRM to analyze mitochondria fragmentation and membrane polarization by confocal microscopy. Cytokines were added after time point 0h (shown in Figure 5) and images were taken every 6h. Data from three healthy donors. Data are mean  $\pm$ SEM; \*\*\* $p<0.001$ ; \*\*\*\* $p<0.0001$  using two-way ANOVA with Tukey's correction.

**Figure S6. Mdivi-1 improves cytokine production in NKDim.**

(A-B) Freshly sorted NKDim and NKBr were cultured with IL-15 for 18h with or w/o Mdivi-1. TMRM intensity was analyzed by FACS. (B-D) Cultured NKBr and NKDim were incubated for 18h with or w/o Mdivi-1. (B) CD45<sup>+</sup> live cells, (C) TNF $\alpha$ , (D) CD107a, Granzyme B and Perforin were measured by FACS. Data from three independent experiments with at least two donors each. Data are mean  $\pm$ SEM; not significant (ns or not indicated),  $p>0.05$ ; \* $p<0.05$ ; \*\* $p<0.01$ ; \*\*\* $p<0.001$  using two-way ANOVA with Tukey's correction.

**Figure S7. CMV<sup>+</sup> donors have polarized mitochondria.**

(A-B) Analysis of NKDim subsets in donors with different levels of mitochondria polarization (CMV<sup>+</sup> vs CMV<sup>-</sup>, respectively high versus low level of TMRM); (A) representative FACS analysis of NKG2C, NKG2A in NKDimCD57<sup>+</sup> and NKDimCD57<sup>-</sup> subsets and histogram depicting TMRM levels in the indicated subsets; (B) TMRM intensity in the identified subsets. (C) Granzyme B and Perforin were measured by FACS in the indicated culture conditions. Data are mean  $\pm$ SEM; not significant (not indicated), \*\* $p<0.01$ ; \*\*\* $p<0.001$ ; using one-way ANOVA.

# Supplementary 1

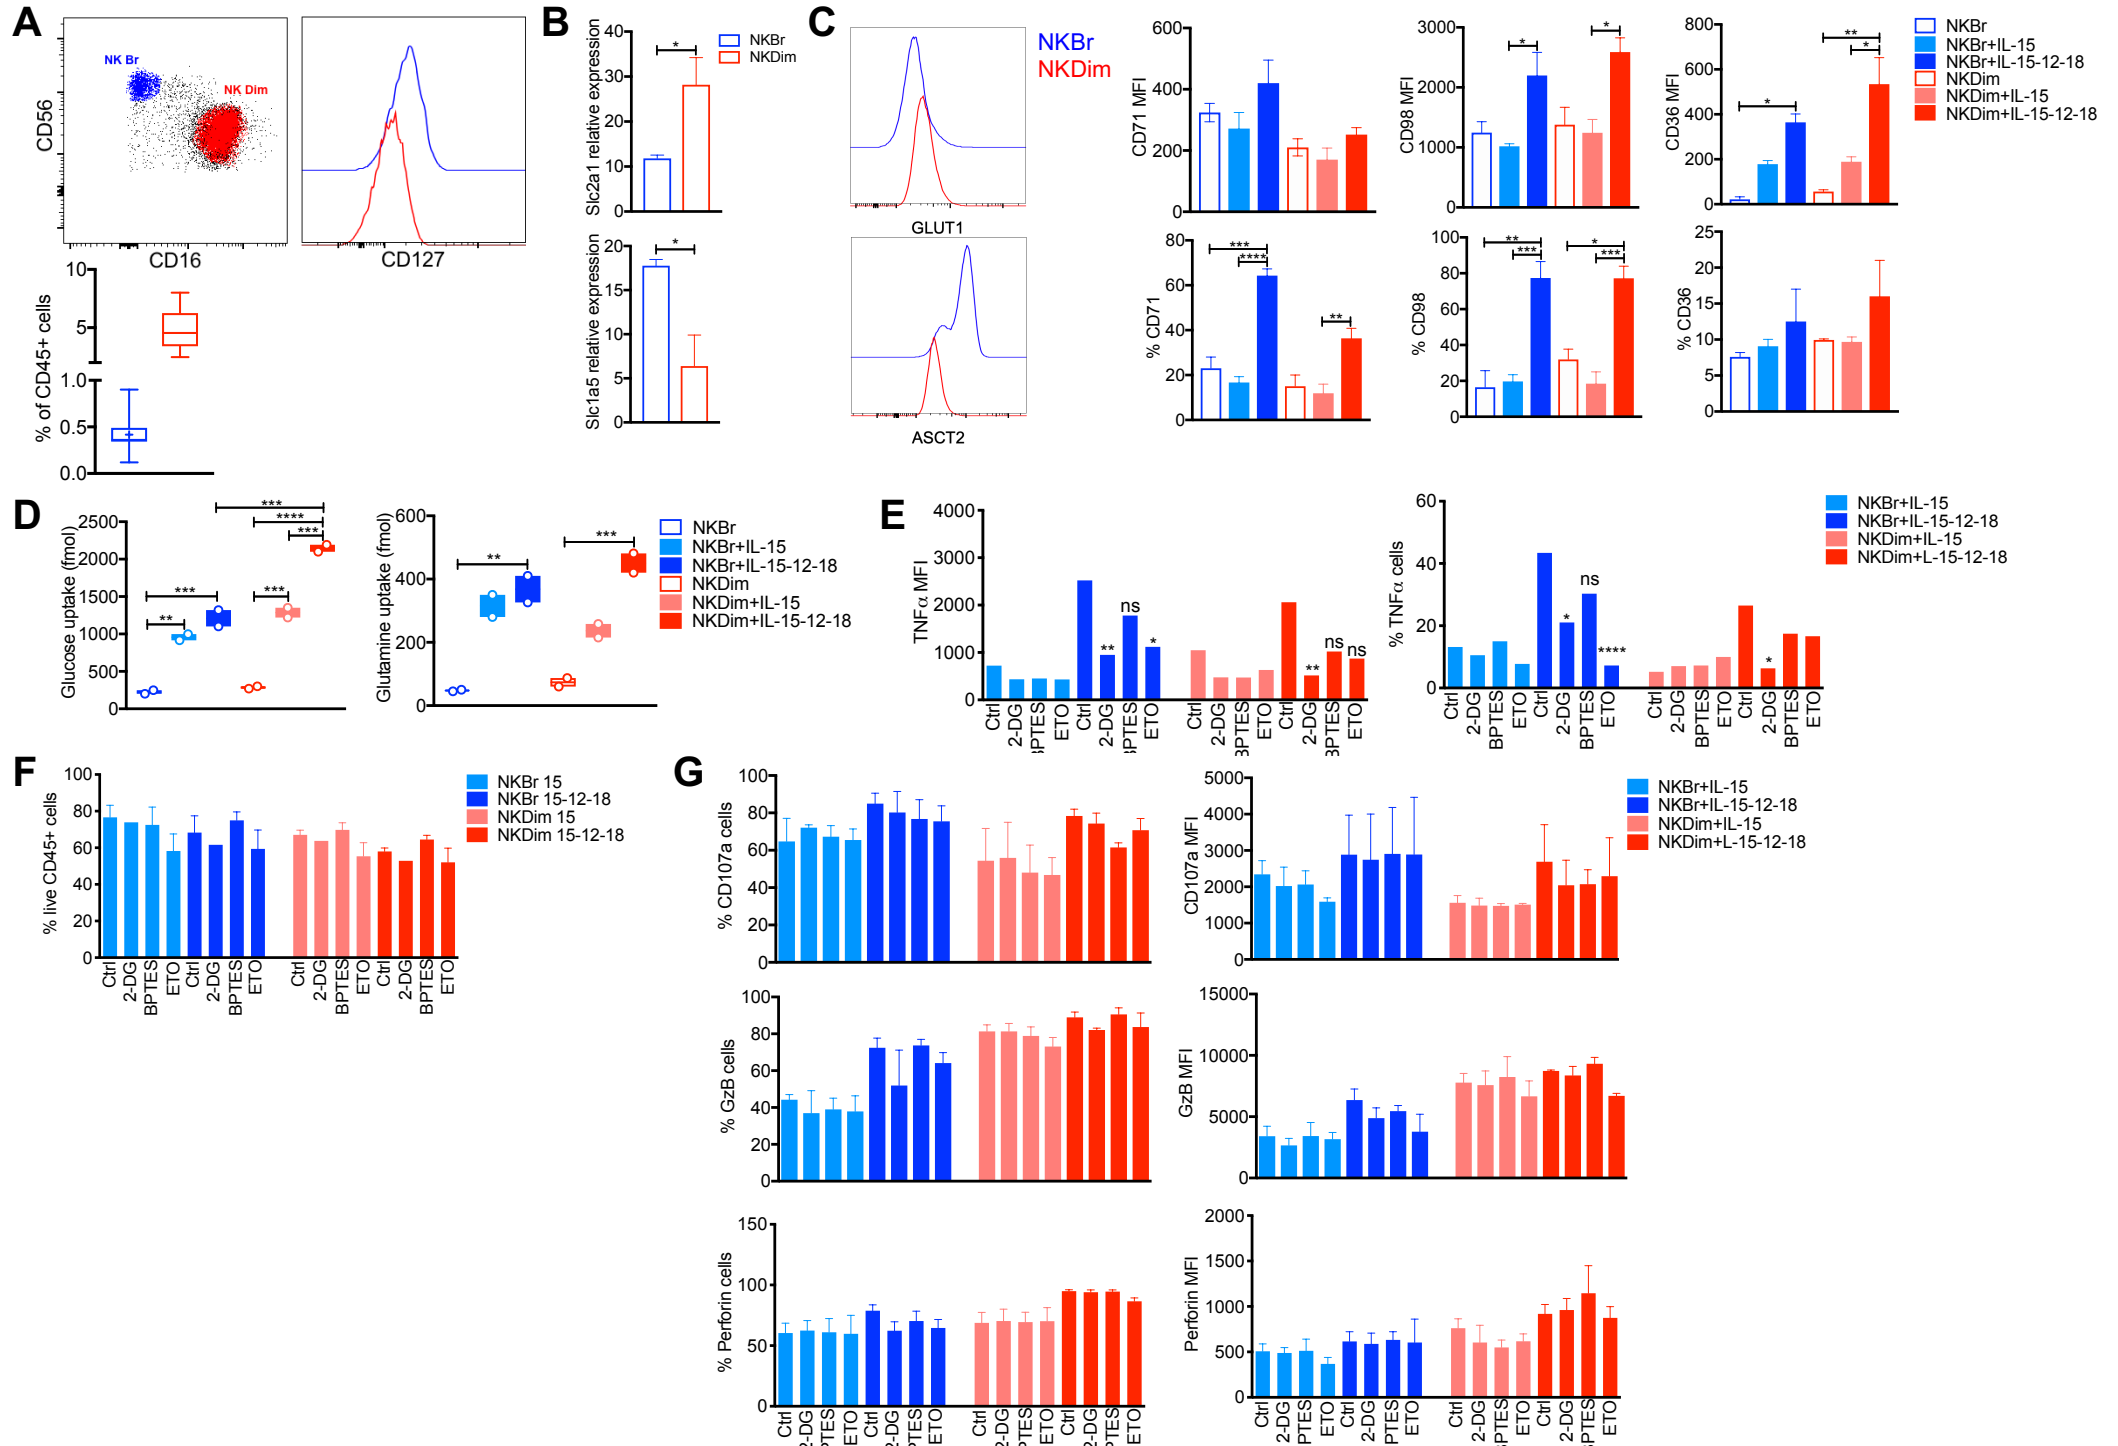

# Supplementary 2

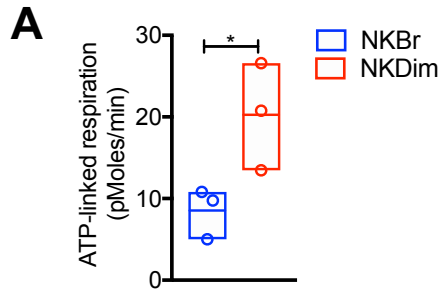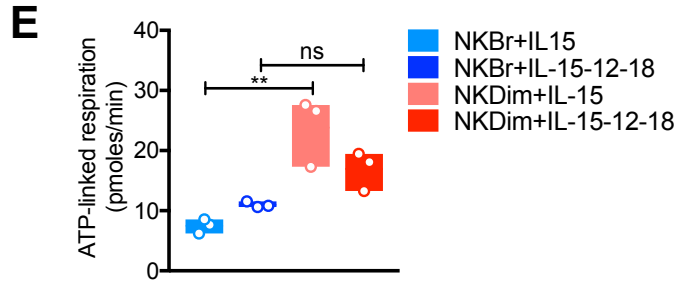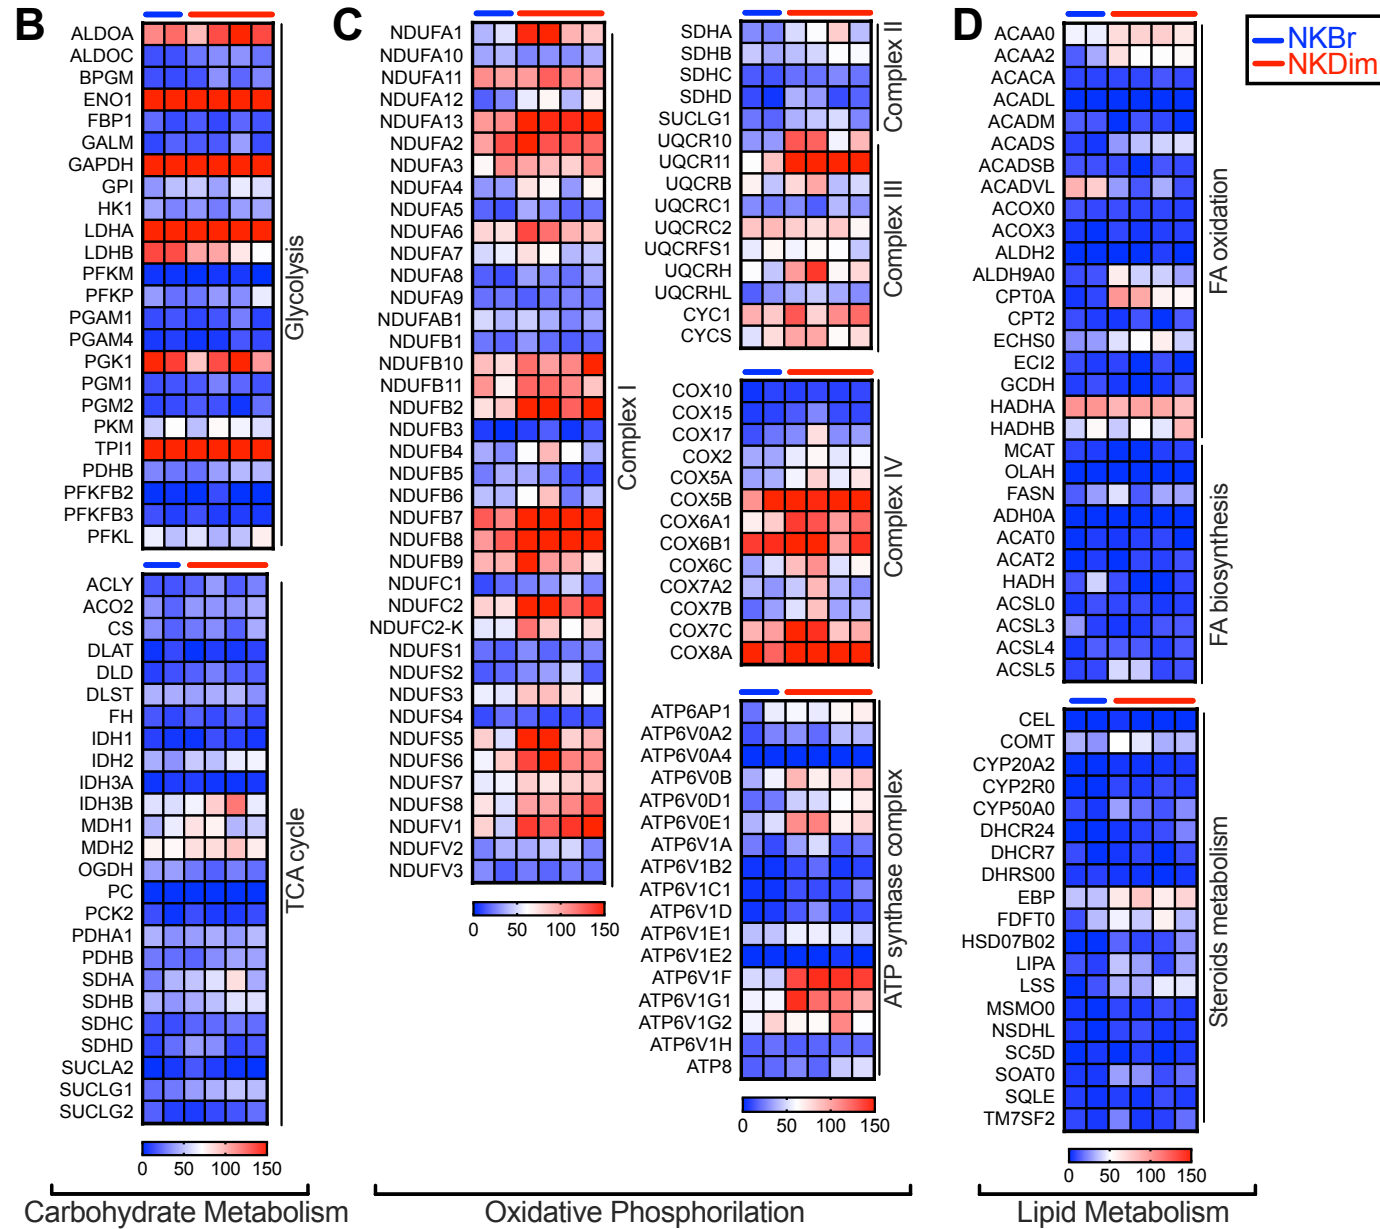

# Supplementary 3

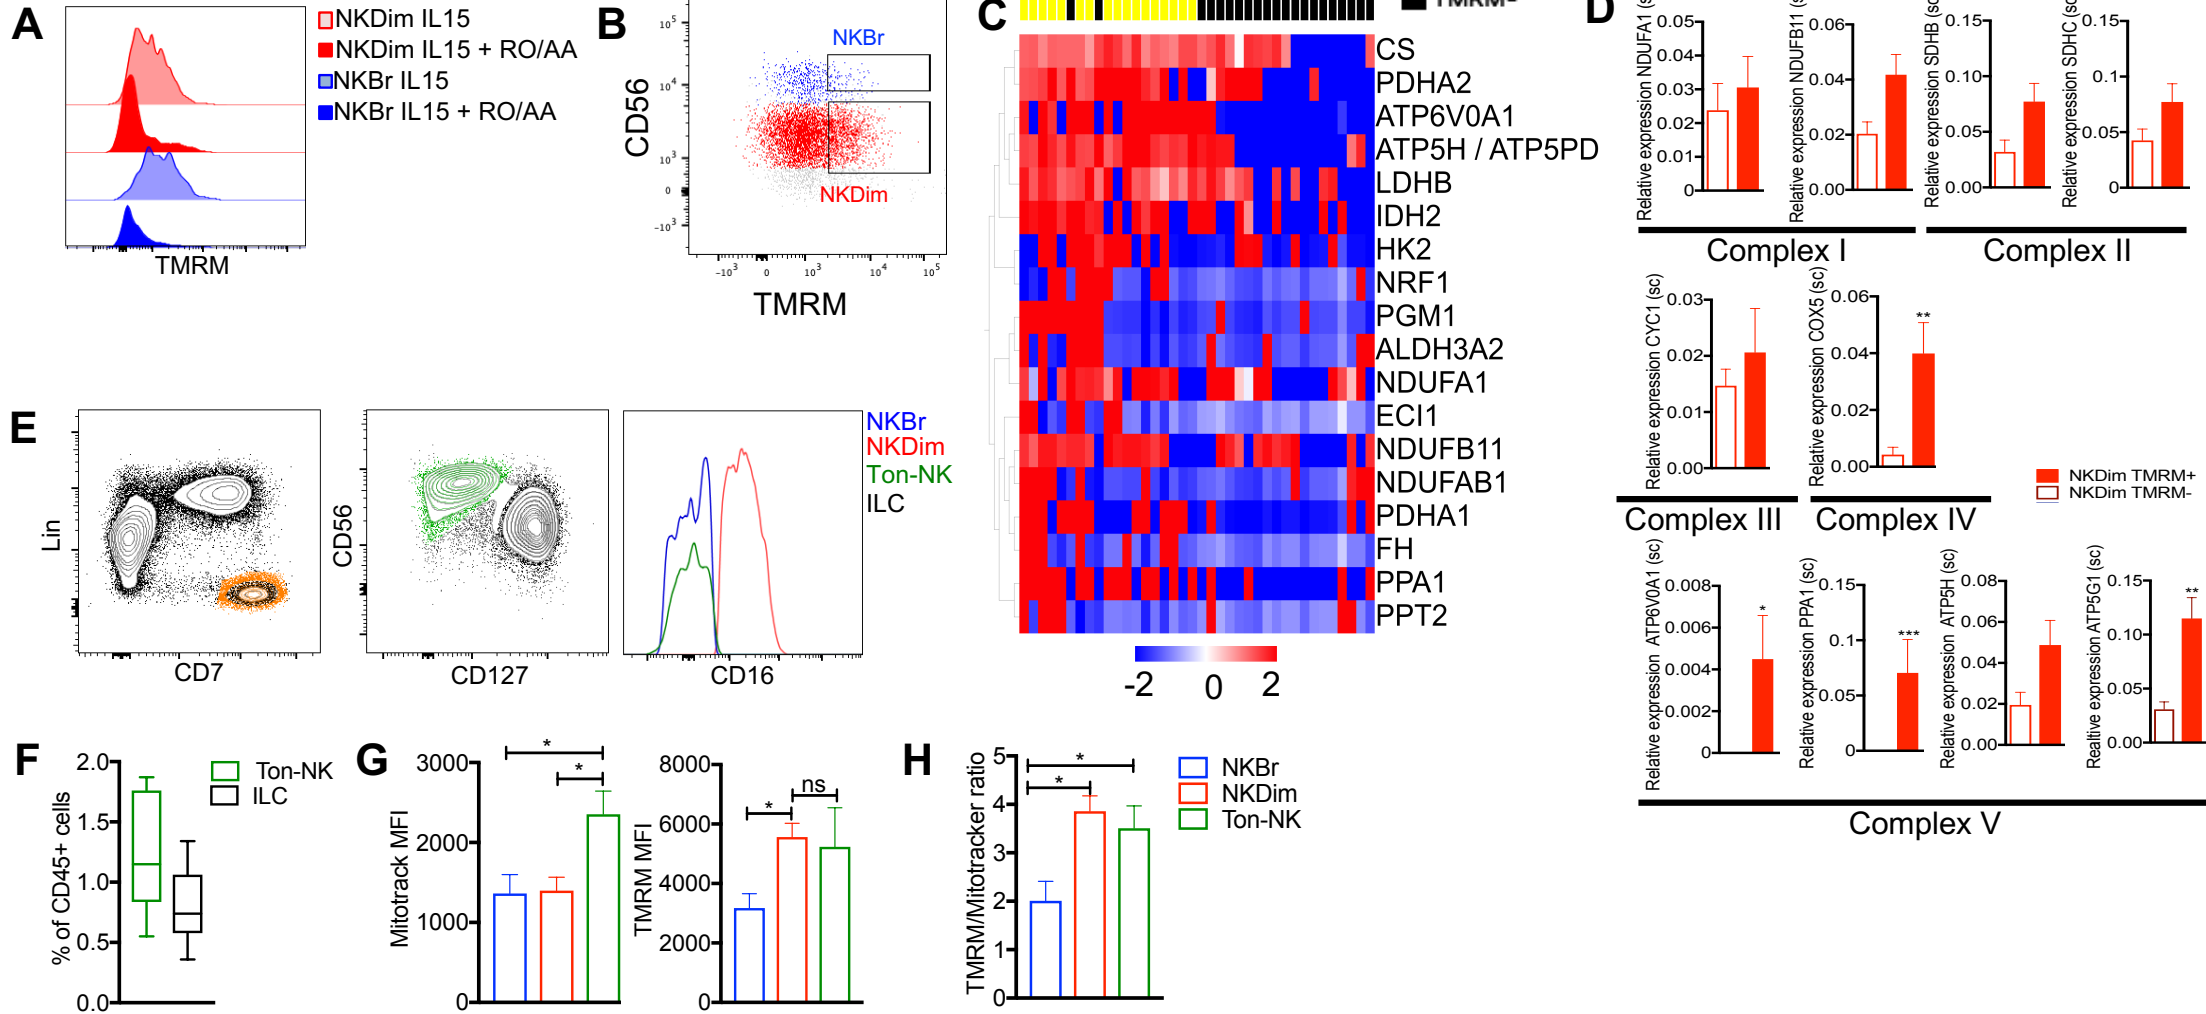

# Supplementary 4

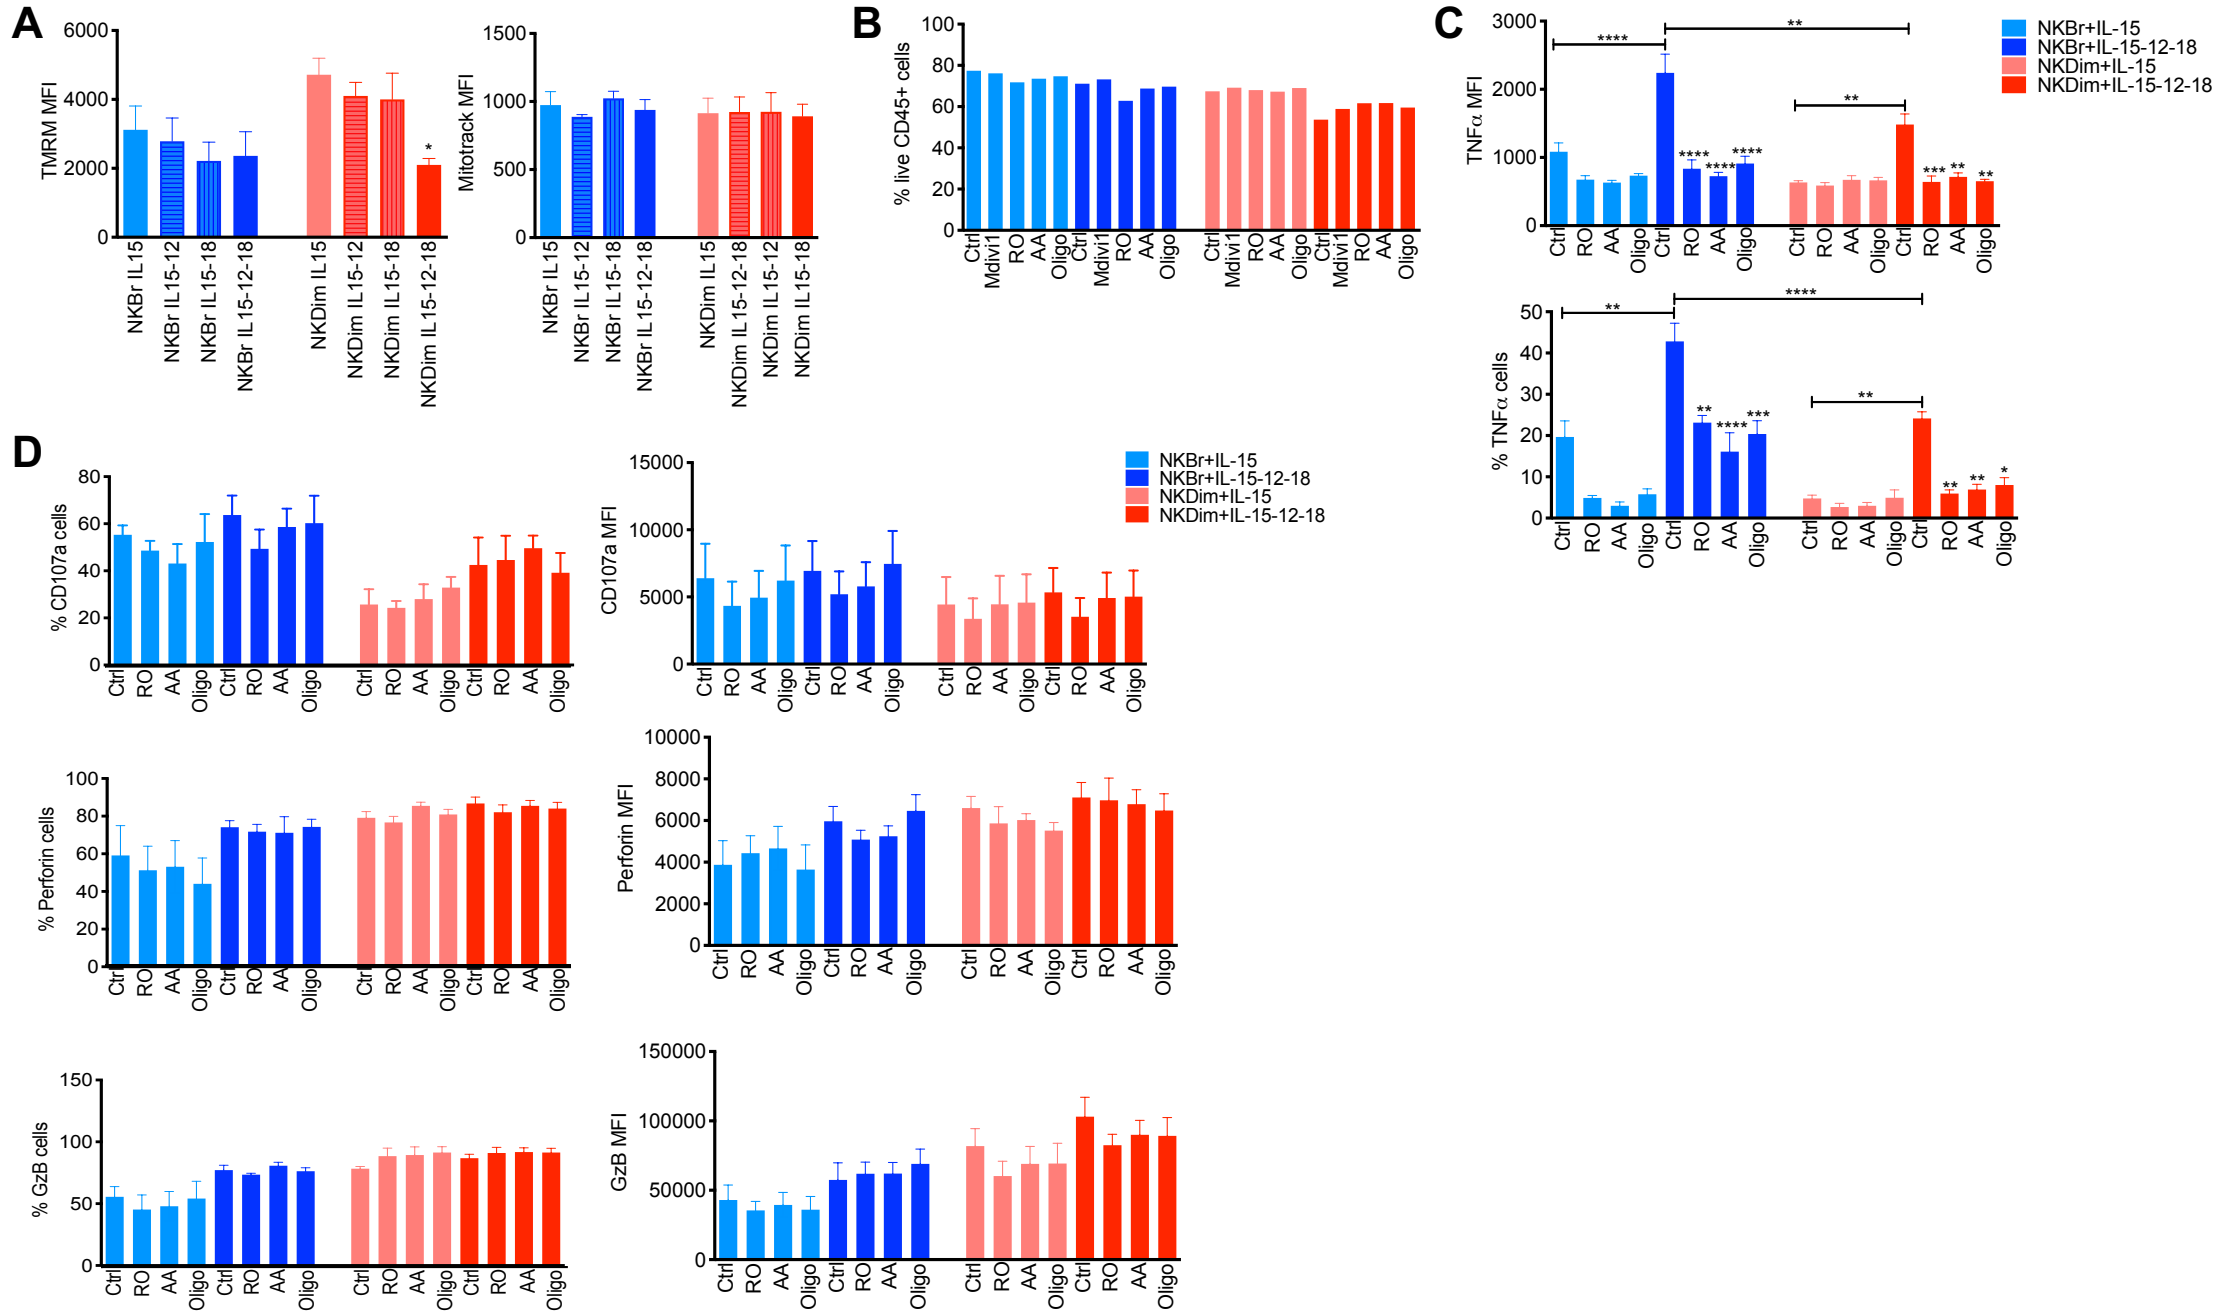



# Supplementary 5

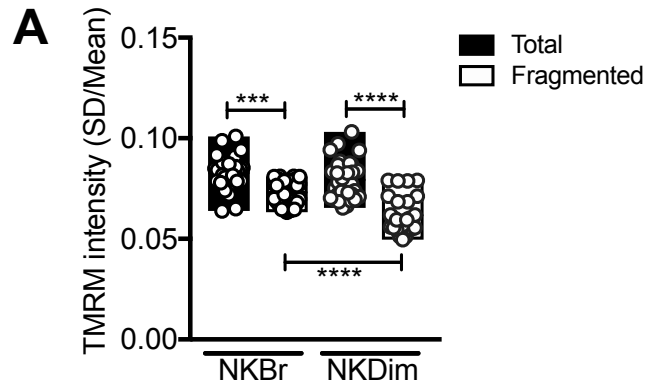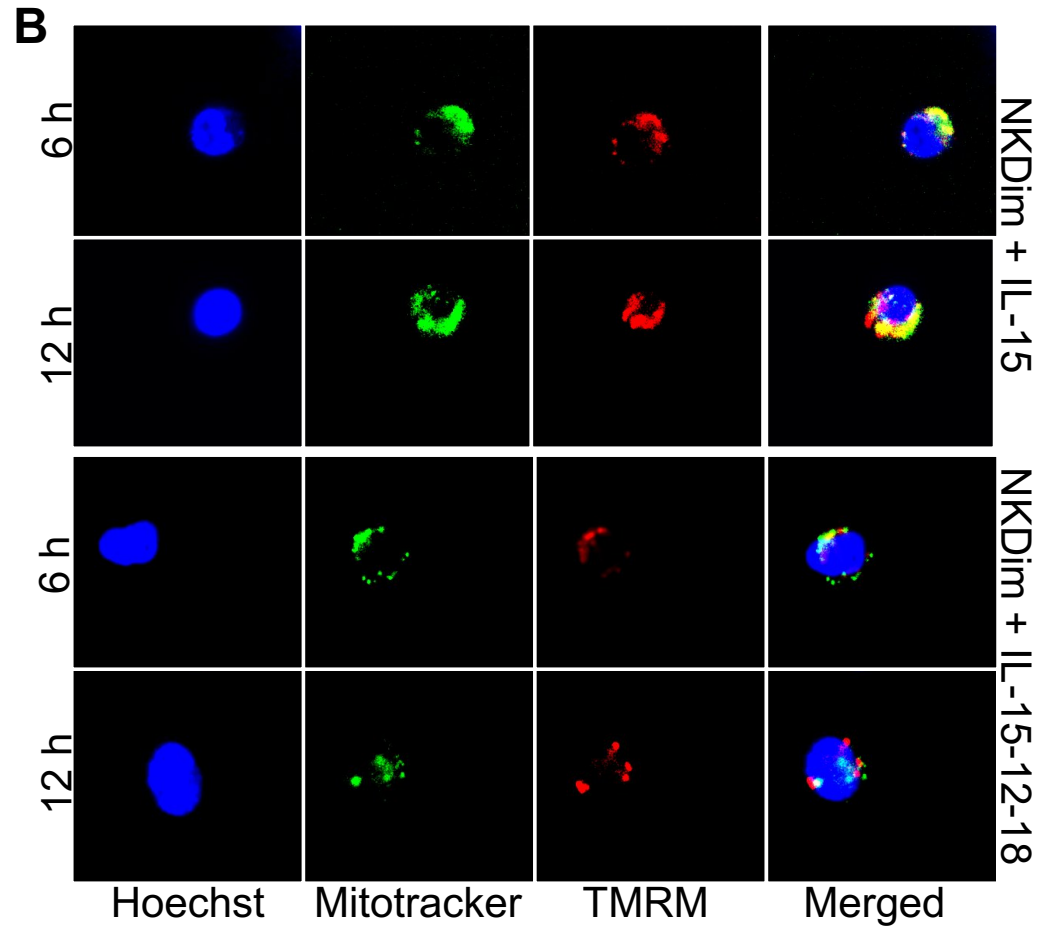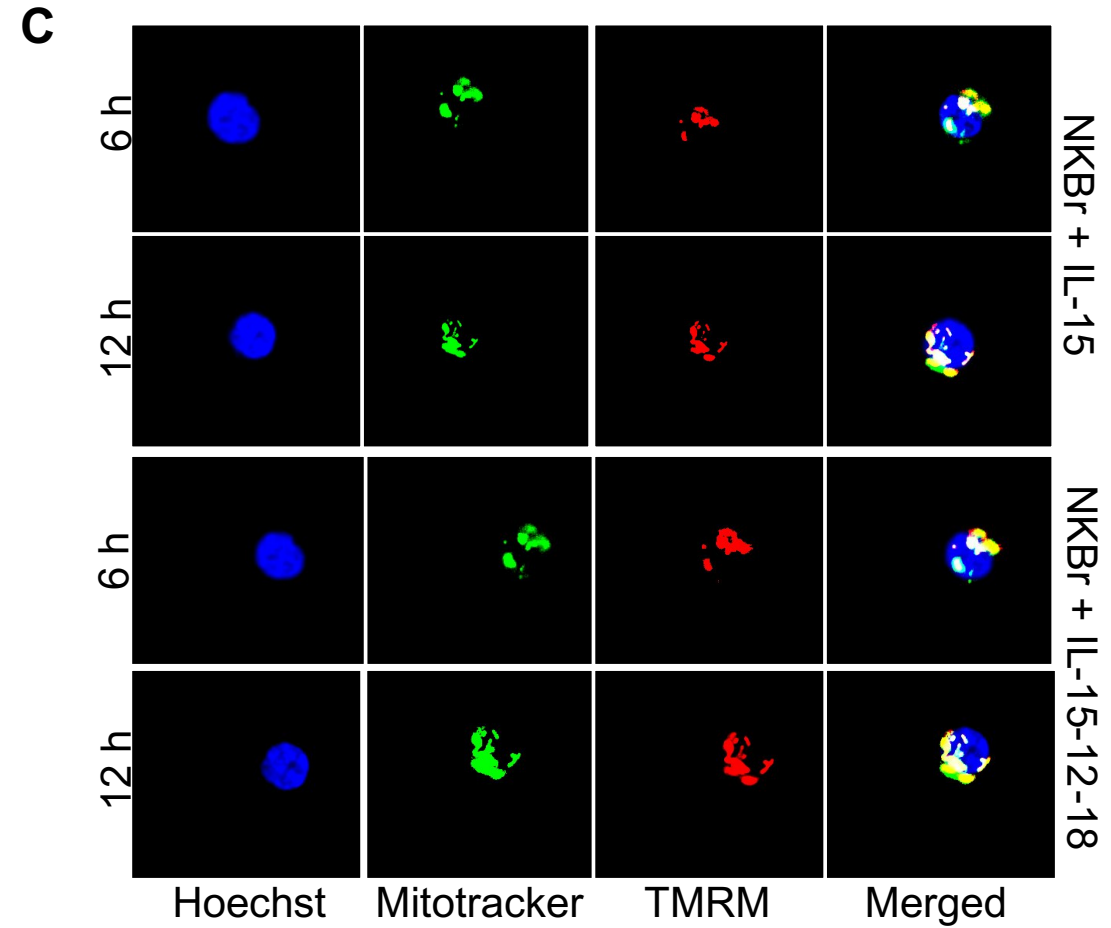

# Supplementary 6

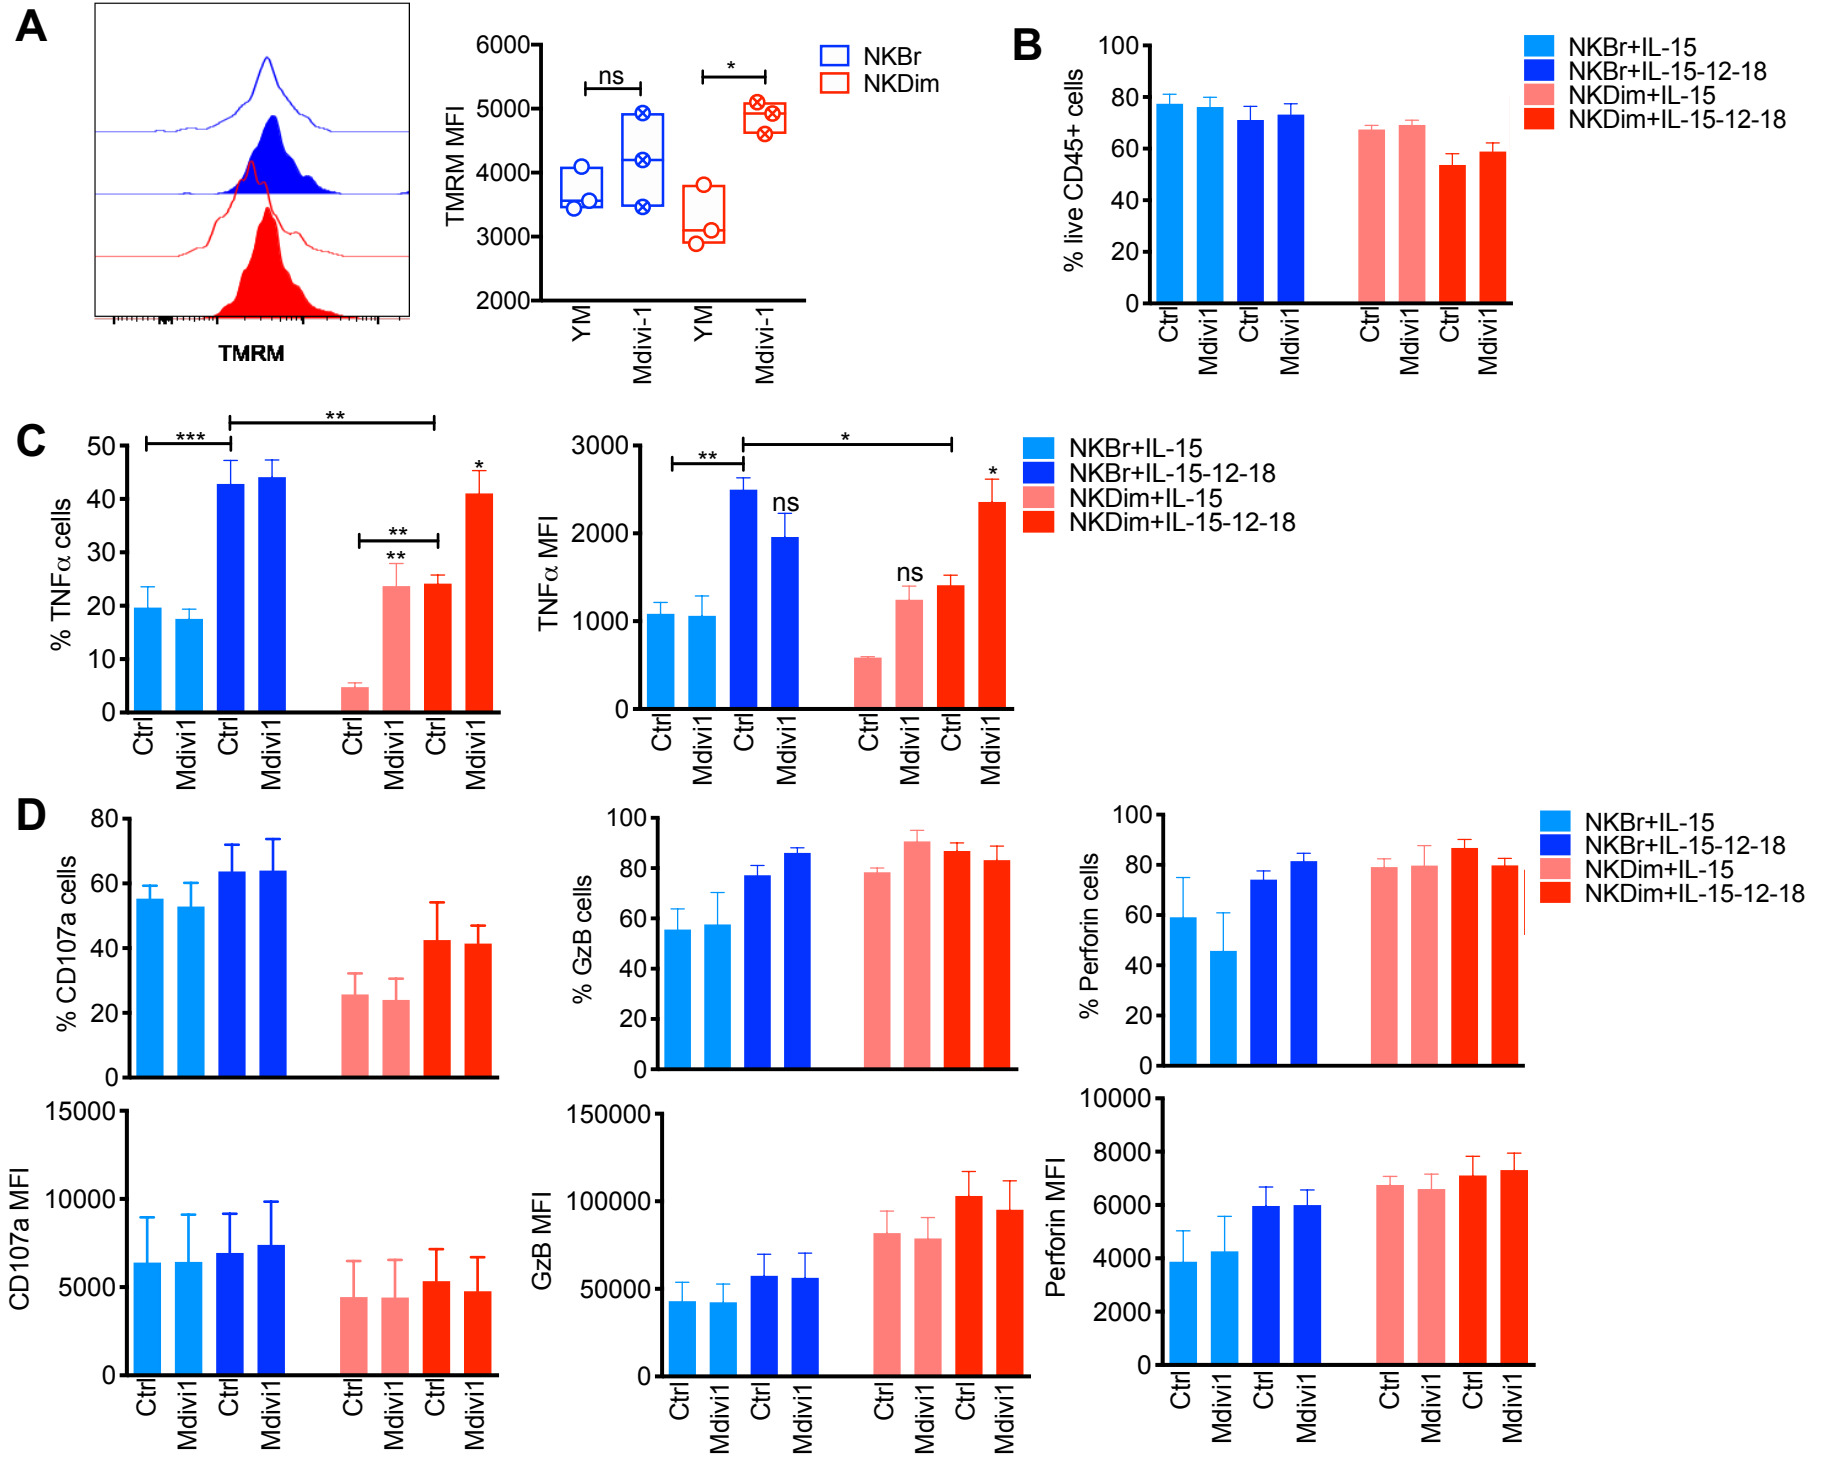

# Supplementary 7

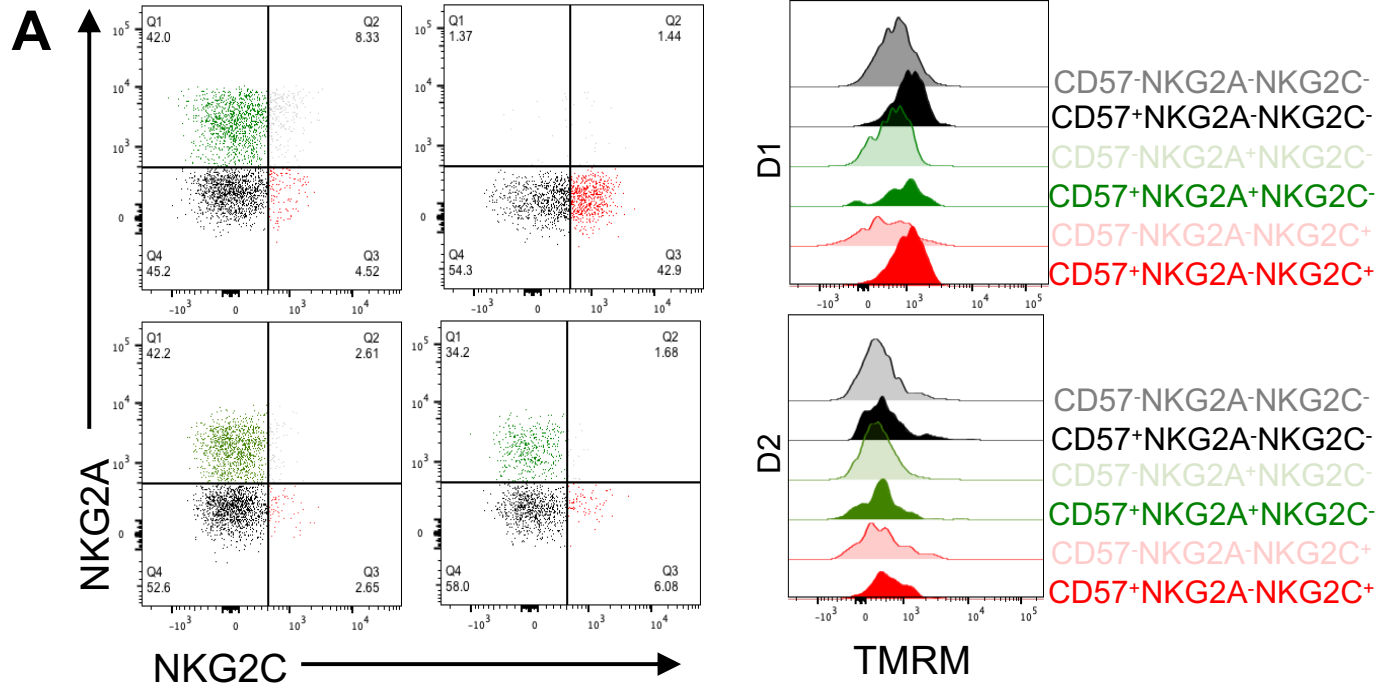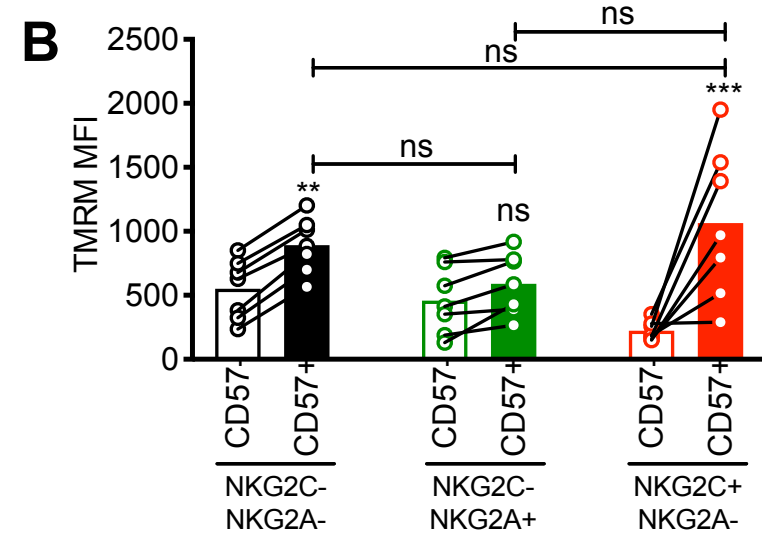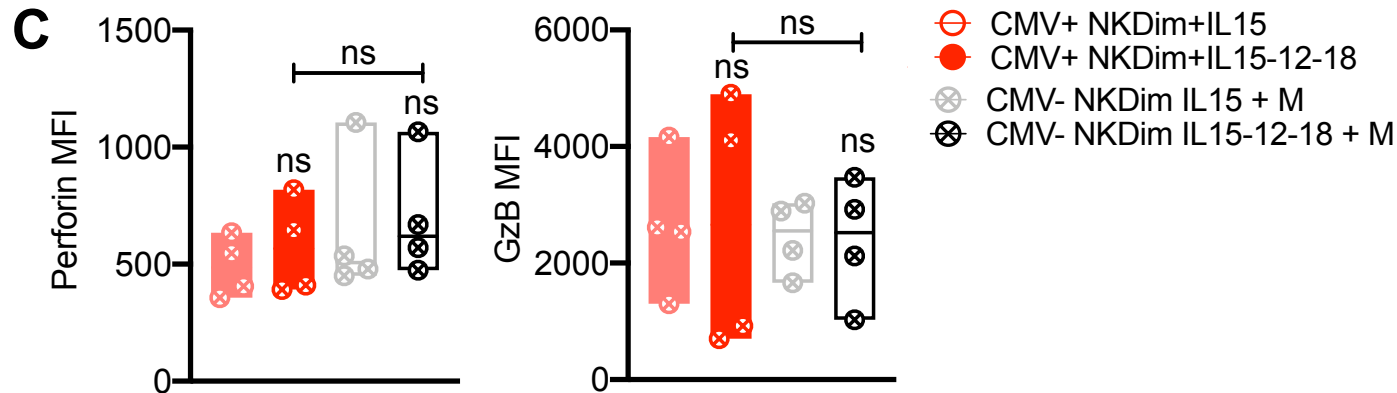

| GLYCOLYSIS |                 |                 |                 |                 |                 |                 |
|------------|-----------------|-----------------|-----------------|-----------------|-----------------|-----------------|
| Gene       | NKDim           | NKDim           | NKDim           | NKDim           | NKBr            | NKBr            |
| ACSS1      | 35,1054056<br>9 | 38,5037208      | 49,0917024<br>9 | 31,3471319      | 53,4167197<br>8 | 61,6762184<br>3 |
| ACSS2      | 1,40421622<br>8 | 0               | 0               | 1,49272056<br>7 | 4,21710945<br>6 | 4,93409747<br>4 |
| ADH1A      | 0               | 0               | 0               | 0               | 0               | 0               |
| ADH1B      | 0               | 0               | 0               | 0               | 0               | 0               |
| ADH1C      | 0               | 0               | 0               | 0               | 0               | 0               |
| ADH4       | 0               | 0               | 0               | 0               | 0               | 0               |
| ADH5       | 35,1054056<br>9 | 44,1660326<br>8 | 43,3162080<br>8 | 43,2888964<br>3 | 36,5482819<br>5 | 48,1074503<br>7 |
| ADH6       | 0               | 0               | 0               | 0               | 0               | 0               |
| ADH7       | 0               | 0               | 0               | 0               | 0               | 0               |
| ADPGK      | 22,4674596<br>4 | 21,5167851<br>5 | 28,8774720<br>5 | 17,9126468      | 15,4627346<br>7 | 25,9040117<br>4 |
| AKR1A1     | 37,9138381<br>5 | 31,7089465<br>4 | 40,4284608<br>7 | 25,3762496<br>3 | 33,7368756<br>5 | 39,4727797<br>9 |
| ALDH1A3    | 0               | 0               | 0               | 0               | 0               | 0               |
| ALDH1B1    | 0               | 2,26492475<br>3 | 0               | 0               | 0               | 0               |
| ALDH2      | 0               | 0               | 4,33162080<br>8 | 0               | 0               | 0               |
| ALDH3A1    | 0               | 0               | 0               | 0               | 1,40570315<br>2 | 0               |
| ALDH3A2    | 25,2758921      | 14,7220108<br>9 | 18,7703568<br>3 | 22,3908085      | 25,3026567<br>4 | 32,0716335<br>8 |
| ALDH3B1    | 4,21264868<br>3 | 4,52984950<br>5 | 5,77549441      | 0               | 9,83992206<br>4 | 13,5687680<br>5 |
| ALDH3B2    | 0               | 0               | 0               | 0               | 0               | 0               |
| ALDH7A1    | 0               | 0               | 0               | 0               | 0               | 0               |
| ALDH9A1    | 19,6590271<br>9 | 30,5764841<br>6 | 30,3213456<br>5 | 17,9126468      | 7,02851576      | 22,2034386<br>3 |
| ALDOA      | 89,8698385<br>8 | 131,365635<br>7 | 160,269969<br>9 | 132,852130<br>4 | 109,644845<br>9 | 120,885388<br>1 |
| ALDOB      | 0               | 0               | 0               | 0               | 0               | 0               |
| ALDOC      | 21,0632434<br>2 | 27,1790970<br>3 | 28,8774720<br>5 | 20,8980879<br>3 | 11,2456252<br>2 | 11,1017193<br>2 |
| BPGM       | 12,6379460<br>5 | 28,3115594<br>1 | 17,3264832<br>3 | 25,3762496<br>3 | 11,2456252<br>2 | 9,86819494<br>8 |
| DLAT       | 1,40421622<br>8 | 6,79477425<br>8 | 4,33162080<br>8 | 8,9563234       | 2,81140630<br>4 | 11,1017193<br>2 |
| DLD        | 18,2548109<br>6 | 27,1790970<br>3 | 18,7703568<br>3 | 17,9126468      | 8,43421891<br>2 | 13,5687680<br>5 |
| ENO1       | 171,314379<br>8 | 164,207044<br>6 | 255,565627<br>7 | 198,531835<br>4 | 206,638363<br>3 | 228,202008<br>2 |
| ENO2       | 4,21264868<br>3 | 5,66231188<br>2 | 5,77549441      | 1,49272056<br>7 | 1,40570315<br>2 | 0               |
| ENO3       | 7,02108113      | 5,66231188      | 10,1071152      | 5,97088226      | 4,21710945      | 1,23352436      |

|         |                 |                 |                 |                 |                 |                 |
|---------|-----------------|-----------------|-----------------|-----------------|-----------------|-----------------|
|         | 9               | 2               | 2               | 7               | 6               | 9               |
| FBP1    | 14,0421622<br>8 | 9,05969901<br>1 | 17,3264832<br>3 | 11,9417645<br>3 | 18,2741409<br>8 | 9,86819494<br>8 |
| FBP2    | 0               | 0               | 0               | 0               | 0               | 0               |
| G6PC    | 0               | 0               | 0               | 0               | 0               | 0               |
| G6PC2   | 0               | 0               | 0               | 0               | 0               | 0               |
| GALM    | 14,0421622<br>8 | 13,5895485<br>2 | 31,7652192<br>6 | 10,4490439<br>7 | 8,43421891<br>2 | 16,0358167<br>9 |
| GAPDH   | 681,044870<br>5 | 706,656522<br>9 | 655,518615<br>6 | 631,420799<br>7 | 570,715479<br>7 | 615,528659<br>9 |
| GAPDHS  | 0               | 0               | 0               | 0               | 0               | 0               |
| GCK     | 0               | 0               | 0               | 0               | 0               | 0               |
| GPI     | 43,5307030<br>6 | 32,8414089<br>1 | 53,4233233      | 49,2597787      | 29,5197661<br>9 | 40,7063041<br>6 |
| HK1     | 29,4885407<br>8 | 22,6492475<br>3 | 31,7652192<br>6 | 34,3325730<br>3 | 33,7368756<br>5 | 24,6704873<br>7 |
| HK2     | 1,40421622<br>8 | 2,26492475<br>3 | 0               | 0               | 0               | 0               |
| HK3     | 0               | 2,26492475<br>3 | 0               | 0               | 0               | 0               |
| HKDC1   | 0               | 0               | 0               | 0               | 0               | 0               |
| LDHA    | 150,251136<br>4 | 185,723829<br>7 | 170,377085<br>1 | 182,111909<br>1 | 186,958519<br>2 | 198,597423<br>3 |
| LDHAL6A | 0               | 0               | 0               | 0               | 0               | 0               |
| LDHAL6B | 0               | 0               | 0               | 0               | 0               | 0               |
| LDHB    | 98,2951359<br>4 | 98,5242267<br>4 | 70,7498065<br>3 | 59,7088226<br>7 | 133,541799<br>4 | 131,987107<br>4 |
| LDHC    | 0               | 0               | 7,21936801<br>3 | 1,49272056<br>7 | 0               | 0               |
| PANK1   | 1,40421622<br>8 | 1,13246237<br>6 | 0               | 0               | 0               | 0               |
| PCK1    | 0               | 0               | 0               | 0               | 0               | 0               |
| PCK2    | 12,6379460<br>5 | 5,66231188<br>2 | 5,77549441      | 11,9417645<br>3 | 12,6513283<br>7 | 2,46704873<br>7 |
| PDHA1   | 36,5096219<br>2 | 40,7686455<br>5 | 36,0968400<br>6 | 46,2743375<br>7 | 43,5767977<br>1 | 62,9097428      |
| PDHA2   | 0               | 0               | 0               | 0               | 0               | 1,23352436<br>9 |
| PFKM    | 0               | 3,39738712<br>9 | 4,33162080<br>8 | 0               | 2,81140630<br>4 | 2,46704873<br>7 |
| PFKP    | 21,0632434<br>2 | 30,5764841<br>6 | 27,4335984<br>5 | 53,7379404      | 30,9254693<br>4 | 19,7363899      |
| PGAM1   | 8,42529736<br>7 | 12,4570861<br>4 | 23,1019776<br>4 | 7,46360283<br>3 | 9,83992206<br>4 | 12,3352436<br>9 |
| PGAM2   | 0               | 1,13246237<br>6 | 0               | 0               | 0               | 1,23352436<br>9 |
| PGAM4   | 2,80843245<br>6 | 4,52984950<br>5 | 12,9948624<br>2 | 8,9563234       | 4,21710945<br>6 | 6,16762184<br>3 |
| PGK1    | 85,6571898      | 131,365635      | 150,162854      | 102,997719      | 147,598831      | 136,921204      |

|                                  |                 |                 |                 |                 |                 |                 |
|----------------------------------|-----------------|-----------------|-----------------|-----------------|-----------------|-----------------|
|                                  | 9               | 7               | 7               | 1               |                 | 9               |
| PGK2                             | 0               | 0               | 0               | 0               | 0               | 0               |
| PGM1                             | 14,0421622<br>8 | 23,7817099      | 17,3264832<br>3 | 11,9417645<br>3 | 11,2456252<br>2 | 12,3352436<br>9 |
| PGM2                             | 14,0421622<br>8 | 11,3246237<br>6 | 2,88774720<br>5 | 19,4053673<br>7 | 8,43421891<br>2 | 9,86819494<br>8 |
| <b>Oxidative Phosphorylation</b> |                 |                 |                 |                 |                 |                 |
| <b>Gene</b>                      | <b>NKDim</b>    | <b>NKDim</b>    | <b>NKDim</b>    | <b>NKDim</b>    | <b>NKBr</b>     | <b>NKBr</b>     |
| ATP12A                           | 0               | 0               | 0               | 0               | 0               | 0               |
| ATP4A                            | 0               | 0               | 0               | 0               | 0               | 0               |
| ATP4B                            | 0               | 0               | 0               | 0               | 0               | 0               |
| ATP5E                            | 318,757083<br>7 | 403,156606      | 229,575902<br>8 | 186,590070<br>8 | 206,638363<br>3 | 233,136105<br>7 |
| ATP5F1A                          | 88,4656223<br>5 | 120,041011<br>9 | 64,9743121<br>2 | 76,1287489      | 73,0965639      | 64,1432671<br>6 |
| ATP5H                            | 46,3391355<br>2 | 52,0932693<br>1 | 20,2142304<br>4 | 29,8544113<br>3 | 28,1140630<br>4 | 40,7063041<br>6 |
| ATP5J                            | 36,5096219<br>2 | 45,2984950<br>5 | 30,3213456<br>5 | 35,8252936      | 35,1425788      | 32,0716335<br>8 |
| ATP5O                            | 63,1897302<br>5 | 69,0802049<br>6 | 43,3162080<br>8 | 43,2888964<br>3 | 60,4452355<br>3 | 51,8080234<br>8 |
| ATP5S                            | 29,4885407<br>8 | 22,6492475<br>3 | 18,7703568<br>3 | 43,2888964<br>3 | 11,2456252<br>2 | 11,1017193<br>2 |
| ATP6AP1                          | 57,5728653<br>4 | 53,2257316<br>9 | 63,5304385<br>1 | 67,1724255      | 50,6053134<br>7 | 54,2750722<br>2 |
| ATP6V0A1                         | 0               | 0               | 0               | 0               | 0               | 2,46704873<br>7 |
| ATP6V0A2                         | 28,0843245<br>6 | 18,1193980<br>2 | 10,1071152<br>2 | 38,8107347<br>3 | 11,2456252<br>2 | 24,6704873<br>7 |
| ATP6V0A4                         | 0               | 0               | 0               | 0               | 0               | 1,23352436<br>9 |
| ATP6V0B                          | 91,2740548<br>1 | 67,9477425<br>8 | 75,0814273<br>4 | 83,5923517<br>3 | 75,9079702<br>1 | 55,5085965<br>9 |
| ATP6V0C                          | 230,291461<br>4 | 203,843227<br>7 | 294,550214<br>9 | 244,806172<br>9 | 380,945554<br>2 | 440,368199<br>6 |
| ATP6V0D1                         | 44,9349192<br>9 | 48,6958821<br>8 | 59,1988177<br>1 | 68,6651460<br>7 | 18,2741409<br>8 | 22,2034386<br>3 |
| ATP6V0D2                         | 0               | 0               | 0               | 0               | 0               | 0               |
| ATP6V0E1                         | 108,124649<br>5 | 112,113775<br>3 | 66,4181857<br>2 | 79,1141900<br>3 | 57,6338292<br>3 | 49,3409747<br>4 |
| ATP6V0E2                         | 14,0421622<br>8 | 13,5895485<br>2 | 25,9897248<br>5 | 14,9272056<br>7 | 33,7368756<br>5 | 17,2693411<br>6 |
| ATP6V1A                          | 32,2969732<br>4 | 9,05969901<br>1 | 14,4387360<br>3 | 20,8980879<br>3 | 22,4912504<br>3 | 9,86819494<br>8 |
| ATP6V1B1                         | 0               | 0               | 0               | 0               | 0               | 0               |
| ATP6V1B2                         | 9,82951359<br>4 | 18,1193980<br>2 | 4,33162080<br>8 | 7,46360283<br>3 | 2,81140630<br>4 | 2,46704873<br>7 |
| ATP6V1C1                         | 11,2337298<br>2 | 10,1921613<br>9 | 10,1071152<br>2 | 25,3762496<br>3 | 2,81140630<br>4 | 2,46704873<br>7 |

|          |                 |                 |                 |                 |                 |                 |
|----------|-----------------|-----------------|-----------------|-----------------|-----------------|-----------------|
| ATP6V1C2 | 0               | 0               | 1,44387360<br>3 | 0               | 0               | 0               |
| ATP6V1D  | 14,0421622<br>8 | 27,1790970<br>3 | 7,21936801<br>3 | 10,4490439<br>7 | 2,81140630<br>4 | 4,93409747<br>4 |
| ATP6V1E1 | 54,7644328<br>8 | 54,3581940<br>7 | 51,9794496<br>9 | 46,2743375<br>7 | 40,7653914<br>1 | 41,9398285<br>3 |
| ATP6V1E2 | 0               | 0               | 4,33162080<br>8 | 0               | 0               | 1,23352436<br>9 |
| ATP6V1F  | 133,400541<br>6 | 143,822721<br>8 | 141,499613<br>1 | 137,330292<br>1 | 98,3992206<br>4 | 104,849571<br>3 |
| ATP6V1G1 | 143,230055<br>2 | 120,041011<br>9 | 115,509888<br>2 | 95,5341162<br>7 | 85,7478922<br>7 | 107,316620<br>1 |
| ATP6V1G2 | 64,5939464<br>8 | 62,2854307      | 109,734393<br>8 | 59,7088226<br>7 | 56,2281260<br>8 | 80,1790839<br>6 |
| ATP6V1G3 | 0               | 0               | 0               | 0               | 0               | 0               |
| ATP6V1H  | 15,4463785<br>1 | 16,9869356<br>5 | 18,7703568<br>3 | 17,9126468      | 15,4627346<br>7 | 19,7363899      |
| ATP8     | 25,2758921      | 16,9869356<br>5 | 43,3162080<br>8 | 49,2597787      | 15,4627346<br>7 | 48,1074503<br>7 |
| BSG      | 92,6782710<br>3 | 107,583925<br>8 | 76,5253009<br>4 | 76,1287489      | 77,3136733<br>6 | 43,1733529      |
| COX10    | 7,02108113<br>9 | 9,05969901<br>1 | 7,21936801<br>3 | 2,98544113<br>3 | 2,81140630<br>4 | 7,40114621<br>1 |
| COX11    | 14,0421622<br>8 | 18,1193980<br>2 | 18,7703568<br>3 | 8,9563234       | 32,3311725      | 24,6704873<br>7 |
| COX15    | 14,0421622<br>8 | 5,66231188<br>2 | 10,1071152<br>2 | 8,9563234       | 5,62281260<br>8 | 7,40114621<br>1 |
| COX17    | 26,6801083<br>3 | 74,7425168<br>4 | 27,4335984<br>5 | 31,3471319      | 11,2456252<br>2 | 20,9699142<br>7 |
| COX2     | 53,3602166<br>6 | 63,4178930<br>8 | 51,9794496<br>9 | 58,2161021      | 54,8224229<br>3 | 64,1432671<br>6 |
| COX4I1   | 634,705735      | 600,205059<br>5 | 498,136392<br>9 | 570,219256<br>5 | 663,491887<br>7 | 774,653303<br>5 |
| COX4I2   | 0               | 0               | 0               | 0               | 0               | 0               |
| COX5A    | 56,1686491<br>1 | 80,4048287<br>2 | 53,4233233      | 71,6505872      | 82,9364859<br>7 | 86,3467058      |
| COX5B    | 213,440866<br>6 | 146,087646<br>6 | 219,468787<br>6 | 194,053673<br>7 | 156,033049<br>9 | 178,861033<br>4 |
| COX6A1   | 137,613190<br>3 | 129,100710<br>9 | 102,515025<br>8 | 120,910365<br>9 | 67,4737512<br>9 | 82,6461326<br>9 |
| COX6A2   | 0               | 0               | 0               | 0               | 2,81140630<br>4 | 0               |
| COX6B1   | 279,439029<br>3 | 277,453282<br>2 | 200,698430<br>8 | 141,808453<br>8 | 137,758908<br>9 | 193,663325<br>9 |
| COX6B2   | 0               | 0               | 0               | 0               | 0               | 1,23352436<br>9 |
| COX6C    | 88,4656223<br>5 | 106,451463<br>4 | 50,5355760<br>9 | 64,1869843<br>7 | 32,3311725      | 49,3409747<br>4 |
| COX7A1   | 0               | 0               | 0               | 0               | 0               | 0               |

|          |                 |                 |                 |                 |                 |                 |
|----------|-----------------|-----------------|-----------------|-----------------|-----------------|-----------------|
| COX7A2   | 43,5307030<br>6 | 90,5969901<br>1 | 18,7703568<br>3 | 28,3616907<br>7 | 39,3596882<br>6 | 29,6045848<br>5 |
| COX7A2L  | 40,7222706<br>1 | 46,4309574<br>3 | 27,4335984<br>5 | 38,8107347<br>3 | 52,0110166<br>2 | 69,0773646<br>4 |
| COX7B    | 50,5517842      | 87,1996029<br>8 | 33,2090928<br>6 | 37,3180141<br>7 | 18,2741409<br>8 | 32,0716335<br>8 |
| COX7B2   | 0               | 0               | 0               | 0               | 0               | 0               |
| COX7C    | 161,484866<br>2 | 142,690259<br>4 | 85,1885425<br>5 | 76,1287489      | 112,456252<br>2 | 109,783668<br>8 |
| COX8A    | 314,544435      | 271,790970<br>3 | 176,152579<br>5 | 240,328011<br>2 | 163,061565<br>6 | 223,267910<br>7 |
| COX8C    | 0               | 0               | 0               | 0               | 0               | 0               |
| CYC1     | 127,783676<br>7 | 79,2723663<br>5 | 108,290520<br>2 | 120,910365<br>9 | 94,1821111<br>8 | 83,8796570<br>6 |
| CYCS     | 98,2951359<br>4 | 97,3917643<br>7 | 62,0865649<br>1 | 76,1287489      | 50,6053134<br>7 | 75,2449864<br>8 |
| ETFA     | 22,4674596<br>4 | 22,6492475<br>3 | 15,8826096<br>3 | 14,9272056<br>7 | 16,8684378<br>2 | 22,2034386<br>3 |
| ETFB     | 106,720433<br>3 | 84,9346782<br>3 | 108,290520<br>2 | 98,5195574      | 113,861955<br>3 | 93,7478520<br>1 |
| FH       | 18,2548109<br>6 | 11,3246237<br>6 | 18,7703568<br>3 | 10,4490439<br>7 | 15,4627346<br>7 | 9,86819494<br>8 |
| IDH2     | 50,5517842      | 47,5634198<br>1 | 62,0865649<br>1 | 65,6797049<br>3 | 42,1710945<br>6 | 33,3051579<br>5 |
| LDHA     | 150,251136<br>4 | 185,723829<br>7 | 170,377085<br>1 | 182,111909<br>1 | 186,958519<br>2 | 198,597423<br>3 |
| LHPP     | 15,4463785<br>1 | 7,92723663<br>5 | 24,5458512<br>4 | 13,4344851      | 19,6798441<br>3 | 0               |
| MDH2     | 82,8487574<br>4 | 83,8022158<br>5 | 92,4079105<br>7 | 77,6214694<br>7 | 74,5022670<br>5 | 72,7779377<br>4 |
| NDUFA1   | 146,038487<br>7 | 150,617496<br>1 | 92,4079105<br>7 | 83,5923517<br>3 | 37,9539851      | 50,5744991<br>1 |
| NDUFA10  | 25,2758921      | 28,3115594<br>1 | 27,4335984<br>5 | 35,8252936      | 33,7368756<br>5 | 38,2392554<br>3 |
| NDUFA11  | 102,507784<br>6 | 124,570861<br>4 | 108,290520<br>2 | 98,5195574      | 127,918986<br>8 | 139,388253<br>6 |
| NDUFA12  | 53,3602166<br>6 | 64,5503554<br>5 | 38,9845872<br>7 | 67,1724255      | 15,4627346<br>7 | 25,9040117<br>4 |
| NDUFA13  | 162,889082<br>4 | 144,955184<br>2 | 144,387360<br>3 | 217,937202<br>7 | 143,381721<br>5 | 198,597423<br>3 |
| NDUFA2   | 153,059568<br>8 | 129,100710<br>9 | 127,060877      | 122,403086<br>5 | 99,8049237<br>9 | 130,753583<br>1 |
| NDUFA3   | 98,2951359<br>4 | 89,4645277<br>3 | 80,8569217<br>5 | 107,475880<br>8 | 63,2566418<br>4 | 108,550144<br>4 |
| NDUFA4   | 73,0192438<br>4 | 63,4178930<br>8 | 30,3213456<br>5 | 64,1869843<br>7 | 29,5197661<br>9 | 30,8381092<br>1 |
| NDUFA4L2 | 0               | 0               | 0               | 0               | 0               | 0               |
| NDUFA5   | 35,1054056<br>9 | 27,1790970<br>3 | 17,3264832<br>3 | 20,8980879<br>3 | 16,8684378<br>2 | 12,3352436<br>9 |



|               |                 |                 |                 |                 |                 |                 |
|---------------|-----------------|-----------------|-----------------|-----------------|-----------------|-----------------|
| NDUFA6        | 133,400541<br>6 | 118,908549<br>5 | 92,4079105<br>7 | 86,5777928<br>7 | 78,7193765<br>1 | 74,0114621<br>1 |
| NDUFA7        | 74,4234600<br>7 | 62,2854307      | 38,9845872<br>7 | 43,2888964<br>3 | 47,7939071<br>7 | 54,2750722<br>2 |
| NDUFA8        | 32,2969732<br>4 | 26,0466346<br>6 | 20,2142304<br>4 | 34,3325730<br>3 | 15,4627346<br>7 | 11,1017193<br>2 |
| NDUFA9        | 15,4463785<br>1 | 21,5167851<br>5 | 24,5458512<br>4 | 22,3908085      | 19,6798441<br>3 | 20,9699142<br>7 |
| NDUFAB1       | 44,9349192<br>9 | 36,2387960<br>4 | 24,5458512<br>4 | 34,3325730<br>3 | 47,7939071<br>7 | 38,2392554<br>3 |
| NDUFB1        | 29,4885407<br>8 | 19,2518604      | 14,4387360<br>3 | 17,9126468      | 21,0855472<br>8 | 17,2693411<br>6 |
| NDUFB10       | 119,358379<br>4 | 100,789151<br>5 | 109,734393<br>8 | 173,155585<br>7 | 88,5592985<br>7 | 115,951290<br>6 |
| NDUFB11       | 122,166811<br>8 | 121,173474<br>3 | 109,734393<br>8 | 85,0850723      | 115,267658<br>5 | 115,951290<br>6 |
| NDUFB2        | 228,887245<br>1 | 225,360012<br>9 | 124,173129<br>8 | 195,546394<br>2 | 74,5022670<br>5 | 83,8796570<br>6 |
| NDUFB3        | 7,02108113<br>9 | 14,7220108<br>9 | 2,88774720<br>5 | 11,9417645<br>3 | 5,62281260<br>8 | 11,1017193<br>2 |
| NDUFB4        | 58,9770815<br>7 | 90,5969901<br>1 | 60,6426913<br>1 | 37,3180141<br>7 | 35,1425788      | 56,7421209<br>5 |
| NDUFB5        | 35,1054056<br>9 | 26,0466346<br>6 | 11,5509888<br>2 | 8,9563234       | 22,4912504<br>3 | 35,7722066<br>9 |
| NDUFB6        | 60,3812977<br>9 | 87,1996029<br>8 | 21,6581040<br>4 | 40,3034553      | 40,7653914<br>1 | 38,2392554<br>3 |
| NDUFB7        | 325,778164<br>8 | 286,512981<br>2 | 324,871560<br>6 | 397,063670<br>7 | 276,923520<br>9 | 310,848140<br>9 |
| NDUFB8        | 207,824001<br>7 | 194,783528<br>7 | 235,351397<br>2 | 150,764777<br>2 | 172,901487<br>7 | 245,471349<br>3 |
| NDUFB9        | 161,484866<br>2 | 103,054076<br>2 | 95,2956577<br>7 | 73,1433077<br>7 | 92,7764080<br>3 | 113,484241<br>9 |
| NDUFC1        | 23,8716758<br>7 | 29,4440217<br>9 | 44,7600816<br>8 | 25,3762496<br>3 | 9,83992206<br>4 | 18,5028655<br>3 |
| NDUFC2        | 207,824001<br>7 | 154,014883<br>2 | 121,285382<br>6 | 141,808453<br>8 | 130,730393<br>1 | 114,717766<br>3 |
| NDUFC2-KCTD14 | 117,954163<br>1 | 83,8022158<br>5 | 60,6426913<br>1 | 76,1287489      | 61,8509386<br>9 | 53,0415478<br>5 |
| NDUFS1        | 26,6801083<br>3 | 16,9869356<br>5 | 21,6581040<br>4 | 25,3762496<br>3 | 19,6798441<br>3 | 25,9040117<br>4 |
| NDUFS2        | 26,6801083<br>3 | 31,7089465<br>4 | 46,2039552<br>8 | 14,9272056<br>7 | 14,0570315<br>2 | 28,3710604<br>8 |
| NDUFS3        | 85,6571898<br>9 | 88,3320653<br>6 | 73,6375537<br>3 | 62,6942638      | 54,8224229<br>3 | 71,5444133<br>8 |
| NDUFS4        | 16,8505947<br>3 | 10,1921613<br>9 | 11,5509888<br>2 | 11,9417645<br>3 | 9,83992206<br>4 | 19,7363899      |
| NDUFS5        | 157,272217<br>5 | 154,014883<br>2 | 80,8569217<br>5 | 92,5486751<br>3 | 81,5307828<br>1 | 149,256448<br>6 |
| NDUFS6        | 134,804757      | 159,677195      | 112,622141      | 110,461321      | 126,513283      | 82,6461326      |

|        |                 |                 |                 |                 |                 |                 |
|--------|-----------------|-----------------|-----------------|-----------------|-----------------|-----------------|
|        | 9               | 1               |                 | 9               | 7               | 9               |
| NDUFS7 | 81,4445412<br>1 | 71,3451297<br>1 | 80,8569217<br>5 | 85,0850723      | 73,0965639      | 55,5085965<br>9 |
| NDUFS8 | 99,6993521<br>7 | 98,5242267<br>4 | 109,734393<br>8 | 128,373968<br>7 | 192,581331<br>8 | 150,489973      |
| NDUFV1 | 137,613190<br>3 | 125,703323<br>8 | 140,055739<br>5 | 155,242938<br>9 | 179,930003<br>5 | 144,322351<br>1 |
| NDUFV2 | 35,1054056<br>9 | 41,9011079<br>3 | 47,6478288<br>9 | 25,3762496<br>3 | 23,8969535<br>8 | 37,0057310<br>6 |
| NDUFV3 | 22,4674596<br>4 | 16,9869356<br>5 | 23,1019776<br>4 | 20,8980879<br>3 | 26,7083598<br>9 | 14,8022924<br>2 |
| NNT    | 11,2337298<br>2 | 14,7220108<br>9 | 14,4387360<br>3 | 16,4199262<br>3 | 7,02851576      | 13,5687680<br>5 |
| OGDH   | 25,2758921      | 18,1193980<br>2 | 27,4335984<br>5 | 22,3908085      | 36,5482819<br>5 | 37,0057310<br>6 |
| PARK7  | 165,697514<br>9 | 139,292872<br>3 | 164,601590<br>7 | 147,779336<br>1 | 118,079064<br>8 | 123,352436<br>9 |
| PDHB   | 19,6590271<br>9 | 31,7089465<br>4 | 38,9845872<br>7 | 38,8107347<br>3 | 25,3026567<br>4 | 20,9699142<br>7 |
| PDHX   | 1,40421622<br>8 | 4,52984950<br>5 | 7,21936801<br>3 | 8,9563234       | 4,21710945<br>6 | 3,70057310<br>6 |
| PDK1   | 2,80843245<br>6 | 9,05969901<br>1 | 2,88774720<br>5 | 2,98544113<br>3 | 1,40570315<br>2 | 3,70057310<br>6 |
| PDK2   | 7,02108113<br>9 | 11,3246237<br>6 | 15,8826096<br>3 | 23,8835290<br>7 | 7,02851576      | 6,16762184<br>3 |
| PDK4   | 1,40421622<br>8 | 0               | 0               | 0               | 0               | 0               |
| PPA1   | 21,0632434<br>2 | 23,7817099      | 37,5407136<br>7 | 26,8689702      | 37,9539851      | 65,3767915<br>3 |
| PPA2   | 18,2548109<br>6 | 16,9869356<br>5 | 24,5458512<br>4 | 11,9417645<br>3 | 5,62281260<br>8 | 18,5028655<br>3 |
| SCO1   | 8,42529736<br>7 | 6,79477425<br>8 | 7,21936801<br>3 | 17,9126468      | 8,43421891<br>2 | 2,46704873<br>7 |
| SDHA   | 49,1475679<br>7 | 58,8880435<br>7 | 82,3007953<br>5 | 40,3034553      | 26,7083598<br>9 | 54,2750722<br>2 |
| SDHB   | 40,7222706<br>1 | 47,5634198<br>1 | 59,1988177<br>1 | 58,2161021      | 43,5767977<br>1 | 64,1432671<br>6 |
| SDHC   | 19,6590271<br>9 | 20,3843227<br>7 | 25,9897248<br>5 | 20,8980879<br>3 | 14,0570315<br>2 | 12,3352436<br>9 |
| SDHD   | 36,5096219<br>2 | 30,5764841<br>6 | 10,1071152<br>2 | 16,4199262<br>3 | 9,83992206<br>4 | 20,9699142<br>7 |
| SUCLG1 | 36,5096219<br>2 | 43,0335703      | 49,0917024<br>9 | 25,3762496<br>3 | 21,0855472<br>8 | 46,8739260<br>1 |
| TCIRG1 | 140,421622<br>8 | 150,617496<br>1 | 142,943486<br>7 | 152,257497<br>8 | 331,745943<br>9 | 323,183384<br>6 |
| UCP2   | 286,460110<br>5 | 268,393583<br>2 | 463,483426<br>4 | 352,282053<br>7 | 456,853524<br>4 | 409,530090<br>4 |
| UQCR10 | 127,783676<br>7 | 123,438399      | 56,3110705      | 91,0559545<br>7 | 29,5197661<br>9 | 70,3108890<br>1 |

|                                          |                 |                 |                 |                 |                 |                 |
|------------------------------------------|-----------------|-----------------|-----------------|-----------------|-----------------|-----------------|
| UQCR11                                   | 202,207136<br>8 | 208,373077<br>3 | 174,708705<br>9 | 179,126468      | 160,250159<br>3 | 186,262179<br>7 |
| UQCRB                                    | 77,2318925<br>3 | 97,3917643<br>7 | 40,4284608<br>7 | 47,7670581<br>3 | 66,0680481<br>4 | 41,9398285<br>3 |
| UQCRC1                                   | 26,6801083<br>3 | 14,7220108<br>9 | 38,9845872<br>7 | 29,8544113<br>3 | 26,7083598<br>9 | 22,2034386<br>3 |
| UQCRC2                                   | 81,4445412<br>1 | 75,8749792<br>2 | 83,7446689<br>5 | 64,1869843<br>7 | 85,7478922<br>7 | 90,0472789      |
| UQCRFS1                                  | 56,1686491<br>1 | 62,2854307      | 59,1988177<br>1 | 43,2888964<br>3 | 53,4167197<br>8 | 64,1432671<br>6 |
| UQCRH                                    | 102,507784<br>6 | 139,292872<br>3 | 63,5304385<br>1 | 77,6214694<br>7 | 59,0395323<br>8 | 72,7779377<br>4 |
| UQCRHL                                   | 37,9138381<br>5 | 44,1660326<br>8 | 34,6529664<br>6 | 26,8689702      | 15,4627346<br>7 | 28,3710604<br>8 |
| <b>Pyruvate metabolism and TCA cycle</b> |                 |                 |                 |                 |                 |                 |
| <b>Gene</b>                              | <b>NKDim</b>    | <b>NKDim</b>    | <b>NKDim</b>    | <b>NKDim</b>    | <b>NKBr</b>     | <b>NKBr</b>     |
| ACACA                                    | 5,61686491<br>1 | 5,66231188<br>2 | 8,66324161<br>6 | 16,4199262<br>3 | 5,62281260<br>8 | 4,93409747<br>4 |
| ACACB                                    | 0               | 0               | 0               | 2,98544113<br>3 | 0               | 2,46704873<br>7 |
| ACAT1                                    | 2,80843245<br>6 | 4,52984950<br>5 | 5,77549441      | 0               | 1,40570315<br>2 | 3,70057310<br>6 |
| ACAT2                                    | 11,2337298<br>2 | 15,8544732<br>7 | 14,4387360<br>3 | 7,46360283<br>3 | 11,2456252<br>2 | 3,70057310<br>6 |
| ACLY                                     | 19,6590271<br>9 | 36,2387960<br>4 | 17,3264832<br>3 | 28,3616907<br>7 | 15,4627346<br>7 | 14,8022924<br>2 |
| ACO1                                     | 7,02108113<br>9 | 4,52984950<br>5 | 1,44387360<br>3 | 0               | 0               | 1,23352436<br>9 |
| ACO2                                     | 35,1054056<br>9 | 33,9738712<br>9 | 34,6529664<br>6 | 41,7961758<br>7 | 33,7368756<br>5 | 19,7363899      |
| ACOT12                                   | 0               | 0               | 0               | 0               | 0               | 0               |
| ACSS2                                    | 1,40421622<br>8 | 0               | 0               | 1,49272056<br>7 | 4,21710945<br>6 | 4,93409747<br>4 |
| ACYP1                                    | 19,6590271<br>9 | 16,9869356<br>5 | 20,2142304<br>4 | 10,4490439<br>7 | 14,0570315<br>2 | 18,5028655<br>3 |
| ACYP2                                    | 9,82951359<br>4 | 15,8544732<br>7 | 5,77549441      | 19,4053673<br>7 | 5,62281260<br>8 | 7,40114621<br>1 |
| ALDH1B1                                  | 0               | 2,26492475<br>3 | 0               | 0               | 0               | 0               |
| ALDH2                                    | 0               | 0               | 4,33162080<br>8 | 0               | 0               | 0               |
| ALDH3A2                                  | 25,2758921      | 14,7220108<br>9 | 18,7703568<br>3 | 22,3908085      | 25,3026567<br>4 | 32,0716335<br>8 |
| ALDH7A1                                  | 0               | 0               | 0               | 0               | 0               | 0               |
| ALDH9A1                                  | 19,6590271<br>9 | 30,5764841<br>6 | 30,3213456<br>5 | 17,9126468      | 7,02851576      | 22,2034386<br>3 |
| CS                                       | 25,2758921      | 30,5764841<br>6 | 18,7703568<br>3 | 40,3034553      | 30,9254693<br>4 | 18,5028655<br>3 |
| DLAT                                     | 1,40421622      | 6,79477425      | 4,33162080      | 8,9563234       | 2,81140630      | 11,1017193      |

|         |                 |                 |                 |                 |                 |                 |
|---------|-----------------|-----------------|-----------------|-----------------|-----------------|-----------------|
|         | 8               | 8               | 8               |                 | 4               | 2               |
| DLD     | 18,2548109<br>6 | 27,1790970<br>3 | 18,7703568<br>3 | 17,9126468      | 8,43421891<br>2 | 13,5687680<br>5 |
| DLST    | 37,9138381<br>5 | 40,7686455<br>5 | 44,7600816<br>8 | 32,8398524<br>7 | 43,5767977<br>1 | 41,9398285<br>3 |
| FH      | 18,2548109<br>6 | 11,3246237<br>6 | 18,7703568<br>3 | 10,4490439<br>7 | 15,4627346<br>7 | 9,86819494<br>8 |
| GLO1    | 18,2548109<br>6 | 28,3115594<br>1 | 49,0917024<br>9 | 52,2452198<br>3 | 21,0855472<br>8 | 37,0057310<br>6 |
| GRHPR   | 37,9138381<br>5 | 38,5037208      | 43,3162080<br>8 | 55,2306609<br>7 | 39,3596882<br>6 | 62,9097428      |
| HAGH    | 30,8927570<br>1 | 39,6361831<br>7 | 27,4335984<br>5 | 52,2452198<br>3 | 29,5197661<br>9 | 38,2392554<br>3 |
| IDH1    | 2,80843245<br>6 | 12,4570861<br>4 | 8,66324161<br>6 | 4,4781617       | 8,43421891<br>2 | 3,70057310<br>6 |
| IDH2    | 50,5517842      | 47,5634198<br>1 | 62,0865649<br>1 | 65,6797049<br>3 | 42,1710945<br>6 | 33,3051579<br>5 |
| IDH3A   | 7,02108113<br>9 | 3,39738712<br>9 | 2,88774720<br>5 | 4,4781617       | 2,81140630<br>4 | 6,16762184<br>3 |
| IDH3B   | 65,9981627<br>1 | 89,4645277<br>3 | 119,841509      | 62,6942638      | 68,8794544<br>5 | 57,9756453<br>2 |
| IDH3G   | 81,4445412<br>1 | 66,8152802<br>1 | 75,0814273<br>4 | 101,504998<br>5 | 67,4737512<br>9 | 88,8137545<br>4 |
| LDHA    | 150,251136<br>4 | 185,723829<br>7 | 170,377085<br>1 | 182,111909<br>1 | 186,958519<br>2 | 198,597423<br>3 |
| LDHAL6A | 0               | 0               | 0               | 0               | 0               | 0               |
| LDHAL6B | 0               | 0               | 0               | 0               | 0               | 0               |
| LDHB    | 98,2951359<br>4 | 98,5242267<br>4 | 70,7498065<br>3 | 59,7088226<br>7 | 133,541799<br>4 | 131,987107<br>4 |
| LDHC    | 0               | 0               | 7,21936801<br>3 | 1,49272056<br>7 | 0               | 0               |
| LDHD    | 0               | 0               | 0               | 0               | 0               | 0               |
| MDH1    | 80,0403249<br>8 | 74,7425168<br>4 | 44,7600816<br>8 | 50,7524992<br>7 | 43,5767977<br>1 | 62,9097428      |
| MDH2    | 82,8487574<br>4 | 83,8022158<br>5 | 92,4079105<br>7 | 77,6214694<br>7 | 74,5022670<br>5 | 72,7779377<br>4 |
| OGDH    | 25,2758921      | 18,1193980<br>2 | 27,4335984<br>5 | 22,3908085      | 36,5482819<br>5 | 37,0057310<br>6 |
| OGDHL   | 0               | 0               | 0               | 0               | 0               | 0               |
| PC      | 0               | 0               | 0               | 0               | 0               | 1,23352436<br>9 |
| PCK1    | 0               | 0               | 0               | 0               | 0               | 0               |
| PCK2    | 12,6379460<br>5 | 5,66231188<br>2 | 5,77549441      | 11,9417645<br>3 | 12,6513283<br>7 | 2,46704873<br>7 |
| PDHA1   | 36,5096219<br>2 | 40,7686455<br>5 | 36,0968400<br>6 | 46,2743375<br>7 | 43,5767977<br>1 | 62,9097428      |
| PDHA2   | 0               | 0               | 0               | 0               | 0               | 1,23352436<br>9 |
| PDHB    | 19,6590271      | 31,7089465      | 38,9845872      | 38,8107347      | 25,3026567      | 20,9699142      |

|                              |                 |                 |                 |                 |                 |                 |
|------------------------------|-----------------|-----------------|-----------------|-----------------|-----------------|-----------------|
|                              | 9               | 4               | 7               | 3               | 4               | 7               |
| PKLR                         | 0               | 0               | 0               | 0               | 0               | 0               |
| PKM                          | 40,7222706<br>1 | 62,2854307      | 56,3110705      | 49,2597787      | 44,9825008<br>6 | 60,4426940<br>6 |
| SDHA                         | 49,1475679<br>7 | 58,8880435<br>7 | 82,3007953<br>5 | 40,3034553      | 26,7083598<br>9 | 54,2750722<br>2 |
| SDHB                         | 40,7222706<br>1 | 47,5634198<br>1 | 59,1988177<br>1 | 58,2161021      | 43,5767977<br>1 | 64,1432671<br>6 |
| SDHC                         | 19,6590271<br>9 | 20,3843227<br>7 | 25,9897248<br>5 | 20,8980879<br>3 | 14,0570315<br>2 | 12,3352436<br>9 |
| SDHD                         | 36,5096219<br>2 | 30,5764841<br>6 | 10,1071152<br>2 | 16,4199262<br>3 | 9,83992206<br>4 | 20,9699142<br>7 |
| SUCLA2                       | 15,4463785<br>1 | 6,79477425<br>8 | 2,88774720<br>5 | 0               | 1,40570315<br>2 | 4,93409747<br>4 |
| SUCLG1                       | 36,5096219<br>2 | 43,0335703      | 49,0917024<br>9 | 25,3762496<br>3 | 21,0855472<br>8 | 46,8739260<br>1 |
| SUCLG2                       | 5,61686491<br>1 | 10,1921613<br>9 | 14,4387360<br>3 | 7,46360283<br>3 | 18,2741409<br>8 | 20,9699142<br>7 |
| <b>Mitochondria dynamics</b> |                 |                 |                 |                 |                 |                 |
| <b>Gene</b>                  | <b>NKDim</b>    | <b>NKDim</b>    | <b>NKDim</b>    | <b>NKDim</b>    | <b>NKBr</b>     | <b>NKBr</b>     |
| PINK1                        | 7,02108113<br>9 | 16,9869356<br>5 | 30,3213456<br>5 | 7,46360283<br>3 | 7,02851576      | 8,63467058      |
| DNM1L                        | 43,5307030<br>6 | 38,5037208      | 25,9897248<br>5 | 29,8544113<br>3 | 56,2281260<br>8 | 25,9040117<br>4 |
| FIS1                         | 64,5939464<br>8 | 66,8152802<br>1 | 76,5253009<br>4 | 89,563234       | 87,1535954<br>2 | 92,5143276<br>4 |
| GDAP1                        | 4,21264868<br>3 | 0               | 0               | 2,98544113<br>3 | 0               | 2,46704873<br>7 |
| MFF                          | 51,9560004<br>3 | 39,6361831<br>7 | 66,4181857<br>2 | 32,8398524<br>7 | 28,1140630<br>4 | 33,3051579<br>5 |
| MIEF1                        | 30,8927570<br>1 | 23,7817099      | 18,7703568<br>3 | 26,8689702      | 23,8969535<br>8 | 32,0716335<br>8 |
| MIEF2                        | 1,40421622<br>8 | 9,05969901<br>1 | 5,77549441      | 2,98544113<br>3 | 11,2456252<br>2 | 1,23352436<br>9 |
| MTFP1                        | 60,3812977<br>9 | 71,3451297<br>1 | 38,9845872<br>7 | 50,7524992<br>7 | 4,21710945<br>6 | 8,63467058      |
| SH3GLB1                      | 43,5307030<br>6 | 23,7817099      | 36,0968400<br>6 | 64,1869843<br>7 | 46,3882040<br>2 | 38,2392554<br>3 |
| MFN1                         | 8,42529736<br>7 | 9,05969901<br>1 | 2,88774720<br>5 | 0               | 2,81140630<br>4 | 11,1017193<br>2 |
| MFN2                         | 18,2548109<br>6 | 13,5895485<br>2 | 21,6581040<br>4 | 28,3616907<br>7 | 16,8684378<br>2 | 19,7363899      |
| OPA1                         | 15,4463785<br>1 | 10,1921613<br>9 | 12,9948624<br>2 | 8,9563234       | 5,62281260<br>8 | 8,63467058      |
| PHB2                         | 110,933082      | 97,3917643<br>7 | 128,504750<br>6 | 101,504998<br>5 | 113,861955<br>3 | 111,017193<br>2 |
| PLD6                         | 0               | 1,13246237<br>6 | 0               | 0               | 0               | 0               |
| STOML2                       | 16,8505947      | 12,4570861      | 12,9948624      | 16,4199262      | 14,0570315      | 24,6704873      |

|          |                 |                 |                 |                 |                 |                 |
|----------|-----------------|-----------------|-----------------|-----------------|-----------------|-----------------|
|          | 3               | 4               | 2               | 3               | 2               | 7               |
| ACTB     | 717,554492<br>4 | 765,544566<br>4 | 1111,78267<br>4 | 809,054547<br>1 | 413,276726<br>7 | 386,093127<br>4 |
| ACTR10   | 21,0632434<br>2 | 33,9738712<br>9 | 12,9948624<br>2 | 28,3616907<br>7 | 22,4912504<br>3 | 27,1375361<br>1 |
| ACTR1A   | 56,1686491<br>1 | 44,1660326<br>8 | 44,7600816<br>8 | 40,3034553      | 37,9539851      | 29,6045848<br>5 |
| CAPZA1   | 40,7222706<br>1 | 36,2387960<br>4 | 34,6529664<br>6 | 40,3034553      | 26,7083598<br>9 | 49,3409747<br>4 |
| DCTN1    | 36,5096219<br>2 | 49,8283445<br>6 | 50,5355760<br>9 | 44,781617       | 37,9539851      | 51,8080234<br>8 |
| DCTN2    | 42,1264868<br>3 | 46,4309574<br>3 | 38,9845872<br>7 | 26,8689702      | 29,5197661<br>9 | 44,4068772<br>7 |
| DCTN3    | 77,2318925<br>3 | 92,8619148<br>6 | 98,1834049<br>8 | 105,983160<br>2 | 81,5307828<br>1 | 74,0114621<br>1 |
| DCTN4    | 7,02108113<br>9 | 15,8544732<br>7 | 11,5509888<br>2 | 2,98544113<br>3 | 14,0570315<br>2 | 4,93409747<br>4 |
| DCTN5    | 26,6801083<br>3 | 22,6492475<br>3 | 15,8826096<br>3 | 31,3471319      | 16,8684378<br>2 | 22,2034386<br>3 |
| DCTN6    | 29,4885407<br>8 | 20,3843227<br>7 | 17,3264832<br>3 | 19,4053673<br>7 | 35,1425788      | 28,3710604<br>8 |
| DYNC1H1  | 49,1475679<br>7 | 53,2257316<br>9 | 62,0865649<br>1 | 77,6214694<br>7 | 56,2281260<br>8 | 56,7421209<br>5 |
| DYNC1I1  | 0               | 0               | 0               | 0               | 0               | 0               |
| DYNC1I2  | 4,21264868<br>3 | 19,2518604      | 5,77549441      | 7,46360283<br>3 | 8,43421891<br>2 | 3,70057310<br>6 |
| DYNC1LI1 | 22,4674596<br>4 | 16,9869356<br>5 | 18,7703568<br>3 | 13,4344851      | 29,5197661<br>9 | 30,8381092<br>1 |
| DYNC1LI2 | 47,7433517<br>4 | 43,0335703      | 43,3162080<br>8 | 43,2888964<br>3 | 43,5767977<br>1 | 75,2449864<br>8 |
| DYNLL1   | 89,8698385<br>8 | 96,2593019<br>9 | 36,0968400<br>6 | 49,2597787      | 30,9254693<br>4 | 30,8381092<br>1 |
| DYNLL2   | 40,7222706<br>1 | 50,9608069<br>4 | 53,4233233      | 50,7524992<br>7 | 44,9825008<br>6 | 49,3409747<br>4 |
| DYNLRB1  | 84,2529736<br>7 | 98,5242267<br>4 | 86,6324161<br>6 | 107,475880<br>8 | 61,8509386<br>9 | 77,7120352<br>2 |
| DYNLRB2  | 0               | 0               | 0               | 0               | 0               | 0               |
| DYNLT1   | 61,7855140<br>2 | 89,4645277<br>3 | 77,9691745<br>4 | 82,0996311<br>7 | 75,9079702<br>1 | 62,9097428      |
| DYNLT3   | 4,21264868<br>3 | 7,92723663<br>5 | 8,66324161<br>6 | 7,46360283<br>3 | 9,83992206<br>4 | 16,0358167<br>9 |
| FEZ1     | 16,8505947<br>3 | 14,7220108<br>9 | 28,8774720<br>5 | 19,4053673<br>7 | 0               | 0               |
| KIF1B    | 2,80843245<br>6 | 2,26492475<br>3 | 1,44387360<br>3 | 8,9563234       | 8,43421891<br>2 | 3,70057310<br>6 |
| KIF5A    | 0               | 0               | 0               | 0               | 0               | 0               |
| KIF5B    | 68,8065951<br>6 | 47,5634198<br>1 | 59,1988177<br>1 | 59,7088226<br>7 | 64,6623449<br>9 | 55,5085965<br>9 |
| KIF5C    | 4,21264868      | 0               | 0               | 0               | 2,81140630      | 0               |

|                      |                 |                 |                 |                 |                 |                 |
|----------------------|-----------------|-----------------|-----------------|-----------------|-----------------|-----------------|
|                      | 3               |                 |                 |                 | 4               |                 |
| RANBP2               | 23,8716758<br>7 | 23,7817099      | 14,4387360<br>3 | 19,4053673<br>7 | 25,3026567<br>4 | 18,5028655<br>3 |
| RHOT1                | 14,0421622<br>8 | 15,8544732<br>7 | 11,5509888<br>2 | 10,4490439<br>7 | 11,2456252<br>2 | 29,6045848<br>5 |
| RHOT2                | 110,933082      | 112,113775<br>3 | 109,734393<br>8 | 122,403086<br>5 | 64,6623449<br>9 | 88,8137545<br>4 |
| SNPH                 | 5,61686491<br>1 | 3,39738712<br>9 | 0               | 5,97088226<br>7 | 0               | 0               |
| SYBU                 | 0               | 0               | 0               | 0               | 0               | 0               |
| TRAK1                | 8,42529736<br>7 | 14,7220108<br>9 | 11,5509888<br>2 | 4,4781617       | 9,83992206<br>4 | 19,7363899      |
| TRAK2                | 11,2337298<br>2 | 6,79477425<br>8 | 10,1071152<br>2 | 13,4344851      | 25,3026567<br>4 | 28,3710604<br>8 |
| <b>FA Metabolism</b> |                 |                 |                 |                 |                 |                 |
| <b>Gene</b>          | <b>NKDim</b>    | <b>NKDim</b>    | <b>NKDim</b>    | <b>NKDim</b>    | <b>NKBr</b>     | <b>NKBr</b>     |
| ACAA1                | 58,9770815<br>7 | 64,5503554<br>5 | 66,4181857<br>2 | 53,7379404      | 67,4737512<br>9 | 76,4785108<br>5 |
| ACAA2                | 57,5728653<br>4 | 41,9011079<br>3 | 41,8723344<br>8 | 43,2888964<br>3 | 19,6798441<br>3 | 23,436963       |
| ACACA                | 5,61686491<br>1 | 5,66231188<br>2 | 8,66324161<br>6 | 16,4199262<br>3 | 5,62281260<br>8 | 4,93409747<br>4 |
| ACACB                | 0               | 0               | 0               | 2,98544113<br>3 | 0               | 2,46704873<br>7 |
| ACADL                | 0               | 0               | 0               | 0               | 0               | 0               |
| ACADM                | 11,2337298<br>2 | 7,92723663<br>5 | 5,77549441      | 10,4490439<br>7 | 9,83992206<br>4 | 8,63467058      |
| ACADS                | 21,0632434<br>2 | 27,1790970<br>3 | 31,7652192<br>6 | 32,8398524<br>7 | 15,4627346<br>7 | 22,2034386<br>3 |
| ACADSB               | 7,02108113<br>9 | 10,1921613<br>9 | 8,66324161<br>6 | 16,4199262<br>3 | 8,43421891<br>2 | 7,40114621<br>1 |
| ACADVL               | 120,762595<br>6 | 108,716388<br>1 | 124,173129<br>8 | 107,475880<br>8 | 81,5307828<br>1 | 66,6103159      |
| ACAT1                | 2,80843245<br>6 | 4,52984950<br>5 | 5,77549441      | 0               | 1,40570315<br>2 | 3,70057310<br>6 |
| ACAT2                | 11,2337298<br>2 | 15,8544732<br>7 | 14,4387360<br>3 | 7,46360283<br>3 | 11,2456252<br>2 | 3,70057310<br>6 |
| ACOX1                | 7,02108113<br>9 | 5,66231188<br>2 | 5,77549441      | 4,4781617       | 8,43421891<br>2 | 6,16762184<br>3 |
| ACOX3                | 5,61686491<br>1 | 2,26492475<br>3 | 4,33162080<br>8 | 4,4781617       | 2,81140630<br>4 | 1,23352436<br>9 |
| ACSBG1               | 0               | 0               | 0               | 0               | 0               | 0               |
| ACSBG2               | 0               | 0               | 0               | 0               | 0               | 0               |
| ACSL1                | 5,61686491<br>1 | 6,79477425<br>8 | 2,88774720<br>5 | 4,4781617       | 2,81140630<br>4 | 7,40114621<br>1 |
| ACSL3                | 12,6379460<br>5 | 13,5895485<br>2 | 18,7703568<br>3 | 8,9563234       | 21,0855472<br>8 | 14,8022924<br>2 |
| ACSL4                | 9,82951359<br>4 | 9,05969901<br>1 | 4,33162080<br>8 | 8,9563234       | 2,81140630<br>4 | 9,86819494<br>8 |

|         |                 |                 |                 |                 |                 |                 |
|---------|-----------------|-----------------|-----------------|-----------------|-----------------|-----------------|
| ACSL5   | 32,2969732<br>4 | 29,4440217<br>9 | 15,8826096<br>3 | 17,9126468      | 15,4627346<br>7 | 16,0358167<br>9 |
| ACSL6   | 0               | 0               | 0               | 1,49272056<br>7 | 16,8684378<br>2 | 17,2693411<br>6 |
| ADH1A   | 0               | 0               | 0               | 0               | 0               | 0               |
| ADH1B   | 0               | 0               | 0               | 0               | 0               | 0               |
| ADH1C   | 0               | 0               | 0               | 0               | 0               | 0               |
| ADH4    | 0               | 0               | 0               | 0               | 0               | 0               |
| ADH5    | 35,1054056<br>9 | 44,1660326<br>8 | 43,3162080<br>8 | 43,2888964<br>3 | 36,5482819<br>5 | 48,1074503<br>7 |
| ADH6    | 0               | 0               | 0               | 0               | 0               | 0               |
| ADH7    | 0               | 0               | 0               | 0               | 0               | 0               |
| ALDH1B1 | 0               | 2,26492475<br>3 | 0               | 0               | 0               | 0               |
| ALDH2   | 0               | 0               | 4,33162080<br>8 | 0               | 0               | 0               |
| ALDH3A2 | 25,2758921      | 14,7220108<br>9 | 18,7703568<br>3 | 22,3908085      | 25,3026567<br>4 | 32,0716335<br>8 |
| ALDH7A1 | 0               | 0               | 0               | 0               | 0               | 0               |
| ALDH9A1 | 19,6590271<br>9 | 30,5764841<br>6 | 30,3213456<br>5 | 17,9126468      | 7,02851576      | 22,2034386<br>3 |
| CPT1A   | 112,337298<br>2 | 115,511162<br>4 | 93,8517841<br>7 | 85,0850723      | 47,7939071<br>7 | 44,4068772<br>7 |
| CPT1B   | 16,8505947<br>3 | 6,79477425<br>8 | 8,66324161<br>6 | 8,9563234       | 18,2741409<br>8 | 6,16762184<br>3 |
| CPT1C   | 0               | 0               | 0               | 0               | 0               | 0               |
| CPT2    | 12,6379460<br>5 | 7,92723663<br>5 | 1,44387360<br>3 | 19,4053673<br>7 | 7,02851576      | 3,70057310<br>6 |
| CYP4A11 | 0               | 0               | 0               | 0               | 0               | 0               |
| CYP4A22 | 0               | 0               | 0               | 0               | 0               | 0               |
| ECHS1   | 33,7011894<br>7 | 39,6361831<br>7 | 49,0917024<br>9 | 31,3471319      | 49,1996103<br>2 | 30,8381092<br>1 |
| ECI1    | 50,5517842      | 37,3712584<br>2 | 40,4284608<br>7 | 28,3616907<br>7 | 85,7478922<br>7 | 62,9097428      |
| ECI2    | 15,4463785<br>1 | 11,3246237<br>6 | 17,3264832<br>3 | 11,9417645<br>3 | 16,8684378<br>2 | 13,5687680<br>5 |
| EHHADH  | 0               | 0               | 0               | 1,49272056<br>7 | 0               | 0               |
| FASN    | 33,7011894<br>7 | 19,2518604      | 23,1019776<br>4 | 22,3908085      | 9,83992206<br>4 | 20,9699142<br>7 |
| GCDH    | 2,80843245<br>6 | 10,1921613<br>9 | 12,9948624<br>2 | 19,4053673<br>7 | 14,0570315<br>2 | 17,2693411<br>6 |
| HADH    | 7,02108113<br>9 | 11,3246237<br>6 | 10,1071152<br>2 | 5,97088226<br>7 | 8,43421891<br>2 | 30,8381092<br>1 |
| HADHA   | 78,6361087<br>6 | 88,3320653<br>6 | 85,1885425<br>5 | 74,6360283<br>3 | 95,5878143<br>3 | 94,9813763<br>8 |
| HADHB   | 29,4885407<br>8 | 39,6361831<br>7 | 34,6529664<br>6 | 17,9126468      | 60,4452355<br>3 | 43,1733529      |
| MCAT    | 1,40421622      | 1,13246237      | 4,33162080      | 14,9272056      | 5,62281260      | 3,70057310      |



|                            |                 |                 |                 |                 |                 |                 |
|----------------------------|-----------------|-----------------|-----------------|-----------------|-----------------|-----------------|
|                            | 8               | 6               | 8               | 7               | 8               | 6               |
| OLAH                       | 0               | 0               | 0               | 0               | 0               | 0               |
| <b>Steroids Metabolism</b> |                 |                 |                 |                 |                 |                 |
| <b>Gene</b>                | <b>NKDim</b>    | <b>NKDim</b>    | <b>NKDim</b>    | <b>NKDim</b>    | <b>NKBr</b>     | <b>NKBr</b>     |
| AKR1C1                     | 1,40421622<br>8 | 0               | 2,88774720<br>5 | 0               | 0               | 0               |
| AKR1C2                     | 4,21264868<br>3 | 0               | 0               | 2,98544113<br>3 | 0               | 1,23352436<br>9 |
| AKR1C3                     | 117,954163<br>1 | 103,054076<br>2 | 88,0762897<br>6 | 94,0413957      | 4,21710945<br>6 | 3,70057310<br>6 |
| AKR1C4                     | 1,40421622<br>8 | 0               | 0               | 0               | 0               | 0               |
| AKR1D1                     | 0               | 0               | 0               | 1,49272056<br>7 | 0               | 0               |
| CEL                        | 2,80843245<br>6 | 0               | 0               | 0               | 0               | 0               |
| COMT                       | 23,8716758<br>7 | 49,8283445<br>6 | 43,3162080<br>8 | 31,3471319      | 30,9254693<br>4 | 33,3051579<br>5 |
| CYP11A1                    | 0               | 0               | 0               | 0               | 0               | 0               |
| CYP11B1                    | 0               | 0               | 0               | 0               | 0               | 0               |
| CYP11B2                    | 0               | 0               | 0               | 0               | 0               | 0               |
| CYP17A1                    | 0               | 0               | 0               | 0               | 0               | 0               |
| CYP19A1                    | 0               | 0               | 0               | 0               | 0               | 0               |
| CYP1A1                     | 0               | 0               | 0               | 0               | 0               | 0               |
| CYP1A2                     | 0               | 0               | 0               | 0               | 0               | 0               |
| CYP1B1                     | 0               | 0               | 0               | 0               | 0               | 0               |
| CYP21A2                    | 2,80843245<br>6 | 2,26492475<br>3 | 0               | 2,98544113<br>3 | 4,21710945<br>6 | 0               |
| CYP24A1                    | 0               | 0               | 0               | 0               | 0               | 0               |
| CYP27B1                    | 0               | 0               | 0               | 0               | 0               | 0               |
| CYP2E1                     | 2,80843245<br>6 | 0               | 0               | 1,49272056<br>7 | 7,02851576      | 2,46704873<br>7 |
| CYP2R1                     | 7,02108113<br>9 | 4,52984950<br>5 | 8,66324161<br>6 | 0               | 5,62281260<br>8 | 11,1017193<br>2 |
| CYP3A4                     | 0               | 0               | 0               | 0               | 0               | 0               |
| CYP3A5                     | 0               | 0               | 0               | 0               | 0               | 0               |
| CYP3A7                     | 0               | 0               | 0               | 0               | 0               | 0               |
| CYP3A7-<br>CYP3A51P        | 0               | 0               | 0               | 0               | 0               | 0               |
| CYP51A1                    | 26,6801083<br>3 | 16,9869356<br>5 | 10,1071152<br>2 | 22,3908085      | 18,2741409<br>8 | 13,5687680<br>5 |
| CYP7A1                     | 0               | 0               | 0               | 0               | 0               | 0               |
| CYP7B1                     | 0               | 0               | 0               | 0               | 0               | 0               |
| DHCR24                     | 2,80843245<br>6 | 5,66231188<br>2 | 8,66324161<br>6 | 1,49272056<br>7 | 1,40570315<br>2 | 0               |
| DHCR7                      | 2,80843245<br>6 | 6,79477425<br>8 | 0               | 8,9563234       | 8,43421891<br>2 | 1,23352436<br>9 |
| DHRS11                     | 2,80843245<br>6 | 2,26492475<br>3 | 0               | 2,98544113<br>3 | 4,21710945<br>6 | 6,16762184<br>3 |
| EBP                        | 61,7855140<br>2 | 77,0074415<br>9 | 59,1988177<br>1 | 71,6505872      | 35,1425788      | 34,5386823<br>2 |
| FDFT1                      | 46,3391355<br>2 | 36,2387960<br>4 | 56,3110705      | 32,8398524<br>7 | 19,6798441<br>3 | 33,3051579<br>5 |
| HSD11B1                    | 0               | 0               | 0               | 0               | 0               | 0               |
| HSD11B2                    | 0               | 0               | 0               | 0               | 0               | 0               |

|          |                 |                 |                 |                 |                 |                 |
|----------|-----------------|-----------------|-----------------|-----------------|-----------------|-----------------|
| HSD17B1  | 1,40421622<br>8 | 5,66231188<br>2 | 2,88774720<br>5 | 4,4781617       | 1,40570315<br>2 | 4,93409747<br>4 |
| HSD17B12 | 14,0421622<br>8 | 16,9869356<br>5 | 18,7703568<br>3 | 10,4490439<br>7 | 23,8969535<br>8 | 12,3352436<br>9 |
| HSD17B2  | 0               | 0               | 0               | 0               | 0               | 0               |
| HSD17B3  | 0               | 0               | 0               | 0               | 0               | 0               |
| HSD17B6  | 0               | 1,13246237<br>6 | 0               | 2,98544113<br>3 | 0               | 0               |
| HSD17B7  | 16,8505947<br>3 | 10,1921613<br>9 | 12,9948624<br>2 | 11,9417645<br>3 | 7,02851576      | 16,0358167<br>9 |
| HSD17B8  | 8,42529736<br>7 | 5,66231188<br>2 | 11,5509888<br>2 | 7,46360283<br>3 | 8,43421891<br>2 | 12,3352436<br>9 |
| HSD3B1   | 0               | 0               | 0               | 0               | 0               | 0               |
| HSD3B2   | 0               | 0               | 0               | 0               | 0               | 0               |
| LIPA     | 35,1054056<br>9 | 27,1790970<br>3 | 17,3264832<br>3 | 28,3616907<br>7 | 9,83992206<br>4 | 16,0358167<br>9 |
| LRTOMT   | 4,21264868<br>3 | 2,26492475<br>3 | 2,88774720<br>5 | 0               | 1,40570315<br>2 | 3,70057310<br>6 |
| LSS      | 30,8927570<br>1 | 29,4440217<br>9 | 44,7600816<br>8 | 43,2888964<br>3 | 11,2456252<br>2 | 9,86819494<br>8 |
| MSMO1    | 7,02108113<br>9 | 4,52984950<br>5 | 8,66324161<br>6 | 10,4490439<br>7 | 2,81140630<br>4 | 4,93409747<br>4 |
| NSDHL    | 7,02108113<br>9 | 9,05969901<br>1 | 2,88774720<br>5 | 4,4781617       | 4,21710945<br>6 | 11,1017193<br>2 |
| SC5D     | 11,2337298<br>2 | 5,66231188<br>2 | 1,44387360<br>3 | 4,4781617       | 11,2456252<br>2 | 3,70057310<br>6 |
| SOAT1    | 26,6801083<br>3 | 23,7817099      | 8,66324161<br>6 | 16,4199262<br>3 | 14,0570315<br>2 | 13,5687680<br>5 |
| SOAT2    | 0               | 1,13246237<br>6 | 0               | 0               | 0               | 0               |
| SQLE     | 15,4463785<br>1 | 12,4570861<br>4 | 8,66324161<br>6 | 4,4781617       | 15,4627346<br>7 | 12,3352436<br>9 |
| SRD5A1   | 15,4463785<br>1 | 12,4570861<br>4 | 8,66324161<br>6 | 4,4781617       | 15,4627346<br>7 | 12,3352436<br>9 |
| SRD5A2   | 0               | 0               | 0               | 0               | 0               | 0               |
| SRD5A3   | 4,21264868<br>3 | 6,79477425<br>8 | 2,88774720<br>5 | 7,46360283<br>3 | 2,81140630<br>4 | 7,40114621<br>1 |
| STS      | 1,40421622<br>8 | 2,26492475<br>3 | 2,88774720<br>5 | 1,49272056<br>7 | 2,81140630<br>4 | 0               |
| SULT1E1  | 0               | 0               | 0               | 0               | 0               | 0               |
| SULT2B1  | 0               | 0               | 0               | 0               | 0               | 0               |
| TM7SF2   | 21,0632434<br>2 | 13,5895485<br>2 | 15,8826096<br>3 | 5,97088226<br>7 | 7,02851576      | 3,70057310<br>6 |
| UGT1A1   | 0               | 0               | 0               | 0               | 0               | 0               |
| UGT1A10  | 0               | 0               | 0               | 0               | 0               | 0               |
| UGT1A3   | 0               | 0               | 0               | 0               | 0               | 0               |
| UGT1A4   | 0               | 0               | 0               | 0               | 0               | 0               |
| UGT1A5   | 0               | 0               | 0               | 0               | 0               | 0               |
| UGT1A6   | 0               | 0               | 0               | 0               | 0               | 0               |
| UGT1A7   | 0               | 0               | 0               | 0               | 0               | 0               |
| UGT1A8   | 0               | 0               | 0               | 0               | 0               | 0               |
| UGT1A9   | 0               | 0               | 0               | 0               | 0               | 0               |
| UGT2A1   | 0               | 0               | 0               | 0               | 0               | 0               |
| UGT2A2   | 0               | 0               | 0               | 0               | 0               | 0               |
| UGT2A3   | 0               | 0               | 0               | 0               | 0               | 0               |
| UGT2B10  | 0               | 0               | 0               | 0               | 0               | 0               |

|         |   |   |   |   |   |   |
|---------|---|---|---|---|---|---|
| UGT2B11 | 0 | 0 | 0 | 0 | 0 | 0 |
| UGT2B15 | 0 | 0 | 0 | 0 | 0 | 0 |
| UGT2B17 | 0 | 0 | 0 | 0 | 0 | 0 |
| UGT2B28 | 0 | 0 | 0 | 0 | 0 | 0 |
| UGT2B4  | 0 | 0 | 0 | 0 | 0 | 0 |
| UGT2B7  | 0 | 0 | 0 | 0 | 0 | 0 |
